# Supplementary material for: A chromosome-level Camptotheca acuminata genome assembly provides insights into the evolutionary origin of camptothecin biosynthesis
Source: PubMed Central journal article supplement (PMC8192753; doi:10.1038/s41467-021-23872-9), 2021-06-10
Supplement: 41467_2021_23872_MOESM1_ESM.pdf [file 41467_2021_23872_MOESM1_ESM.pdf]

**A chromosome-level *Camptotheca acuminata* genome assembly provides  
insights into the evolutionary origin of camptothecin biosynthesis**

Kang *et al.*

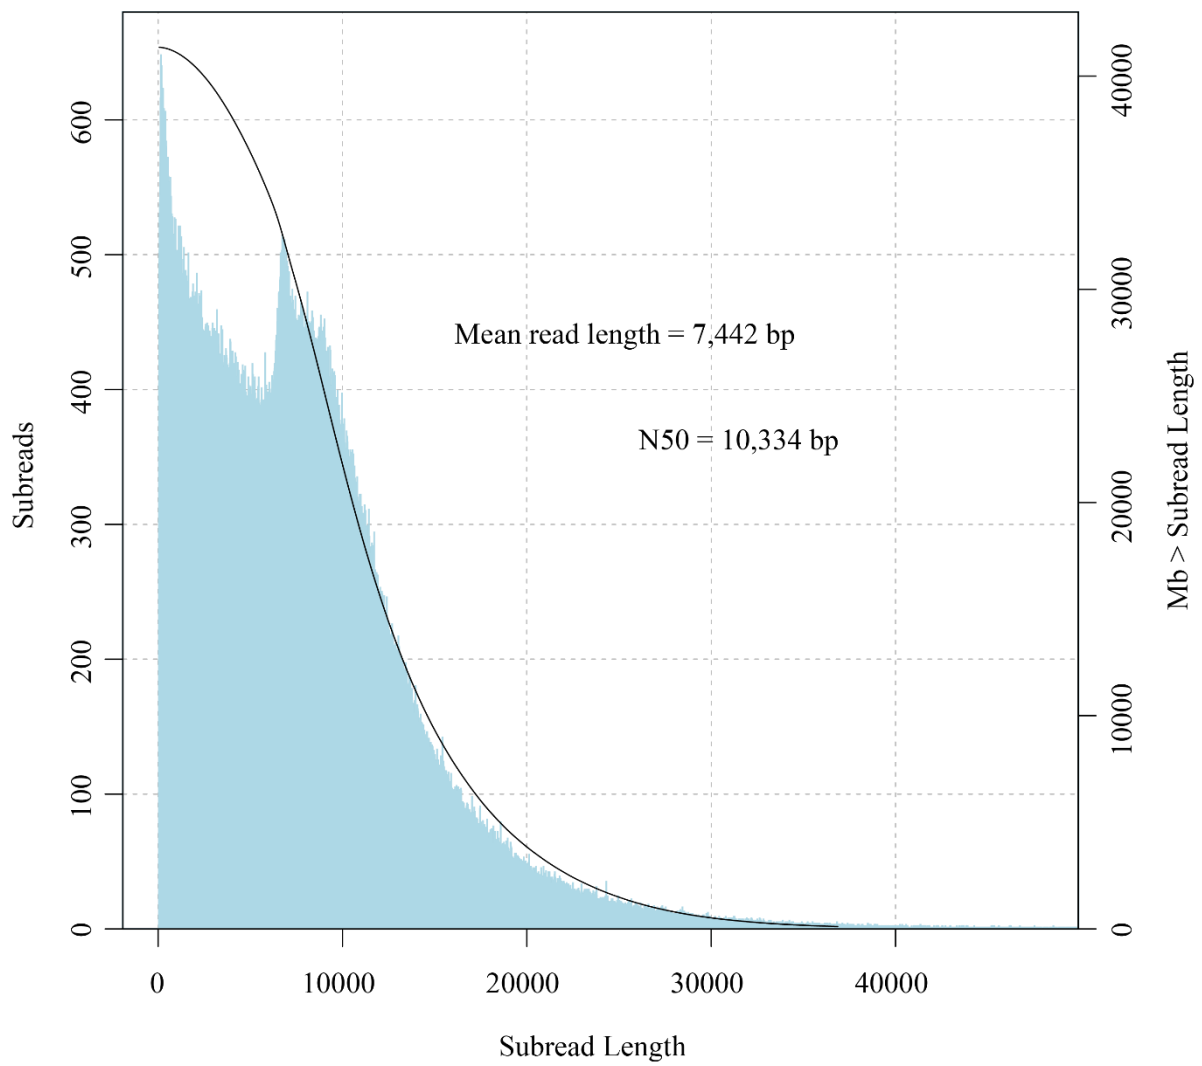

**Supplementary Figure 1.** Histogram of length distribution of raw *C. acuminata* PacBio subreads. Source data are provided as a Source data file.

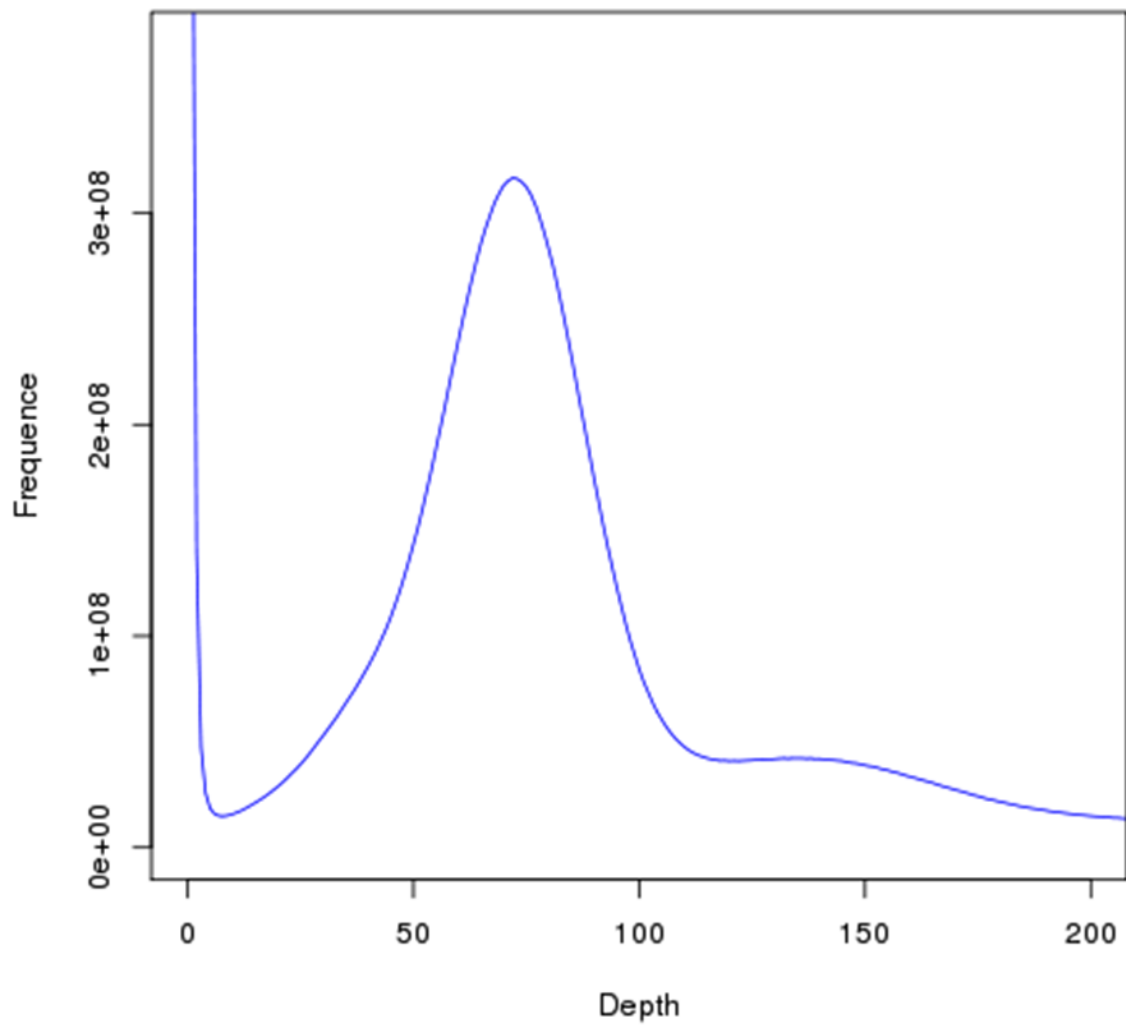

**Supplementary Figure 2.** Estimation of *C. acuminata* genome size by K-mer analysis. The figure shows the frequency of 17 k-mers, which are 17 bp sequences from clean reads of short-insert-size libraries. We identified 29,283,188,036 K-mers and the peak of K-mer depth is 71. Genome size can be estimated as (total K-mer number) / (the volume peak). The genome size of *C. acuminata* was thus estimated as 412.44 Mb, and the revise genome size is 404.95 Mb.

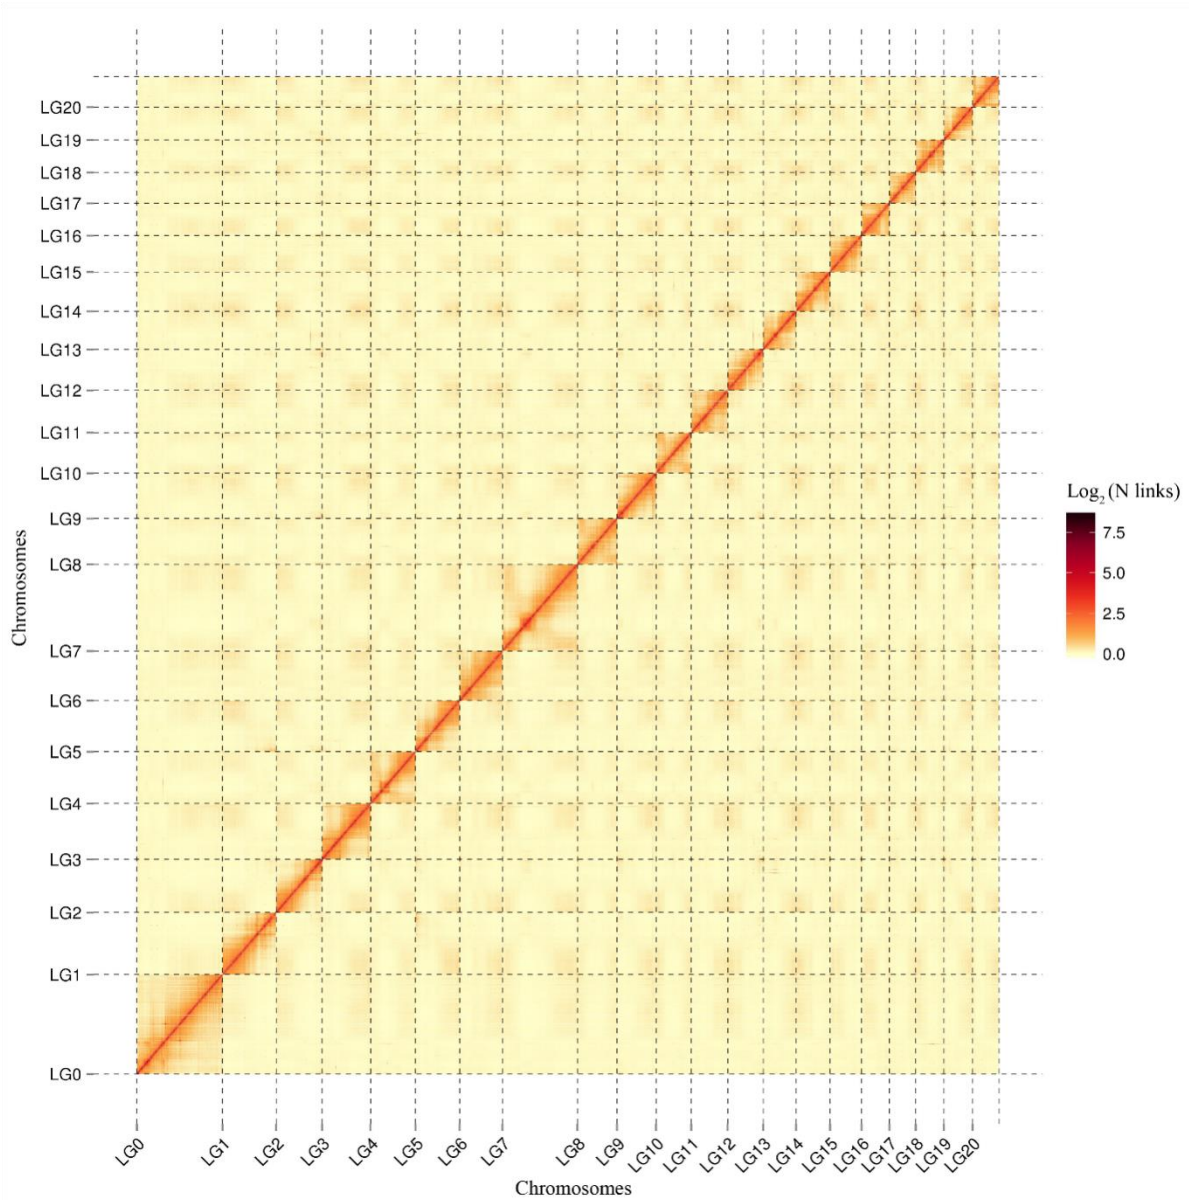

**Supplementary Figure 3.** Hi-C map of the *C. acuminata* genome showing genome-wide all-by-all interactions. The map shows a high resolution of individual chromosomes that are scaffolded and assembled independently.

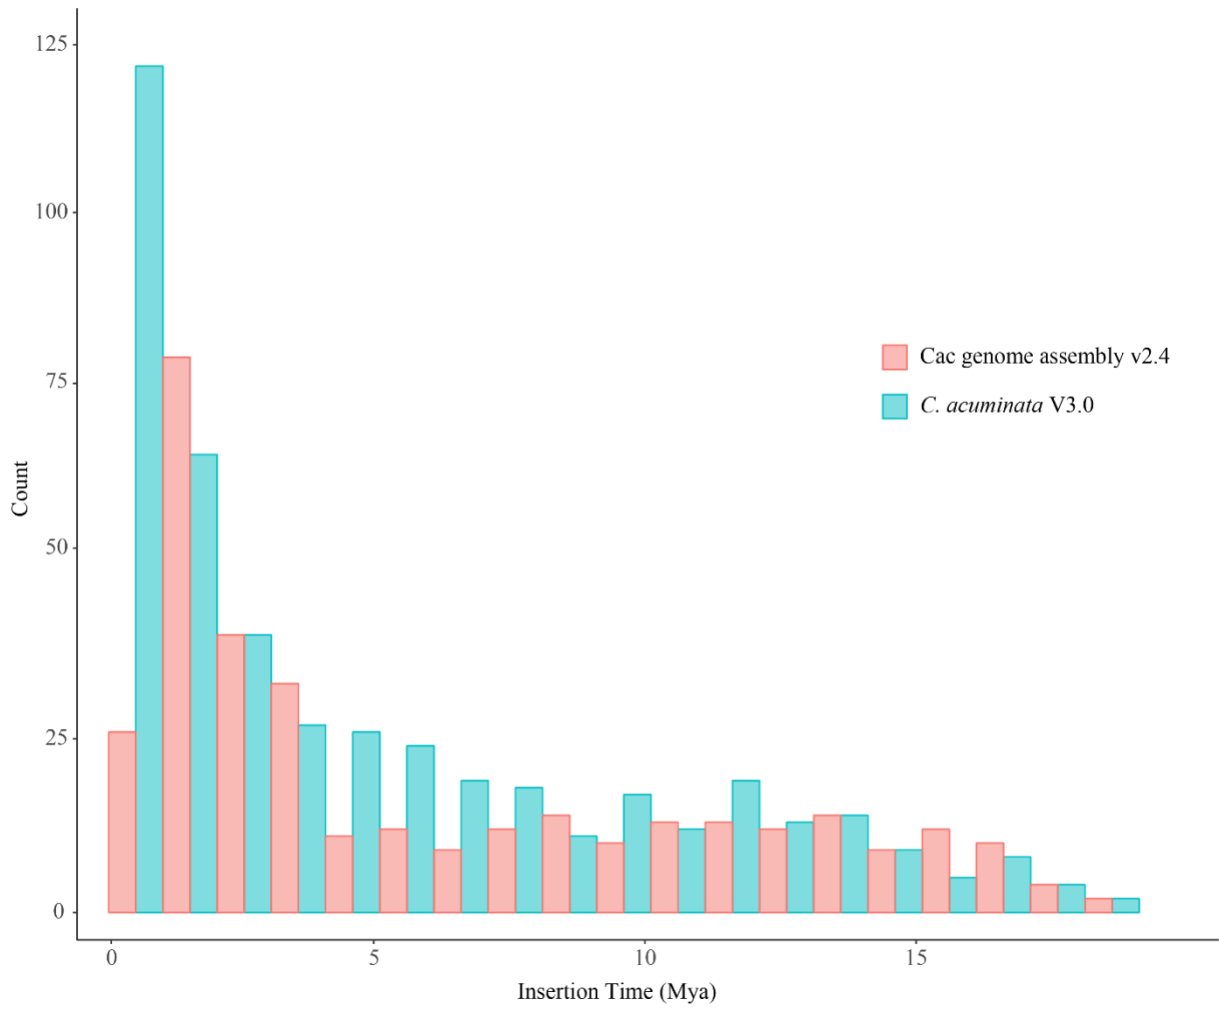

**Supplementary Figure 4.** The number of intact LTR-RTs birthed at different times (million years ago, Mya) in Cac genome assembly v2.4 and *C. acuminata* V3.0 genome. Source data are provided as a Source data file.

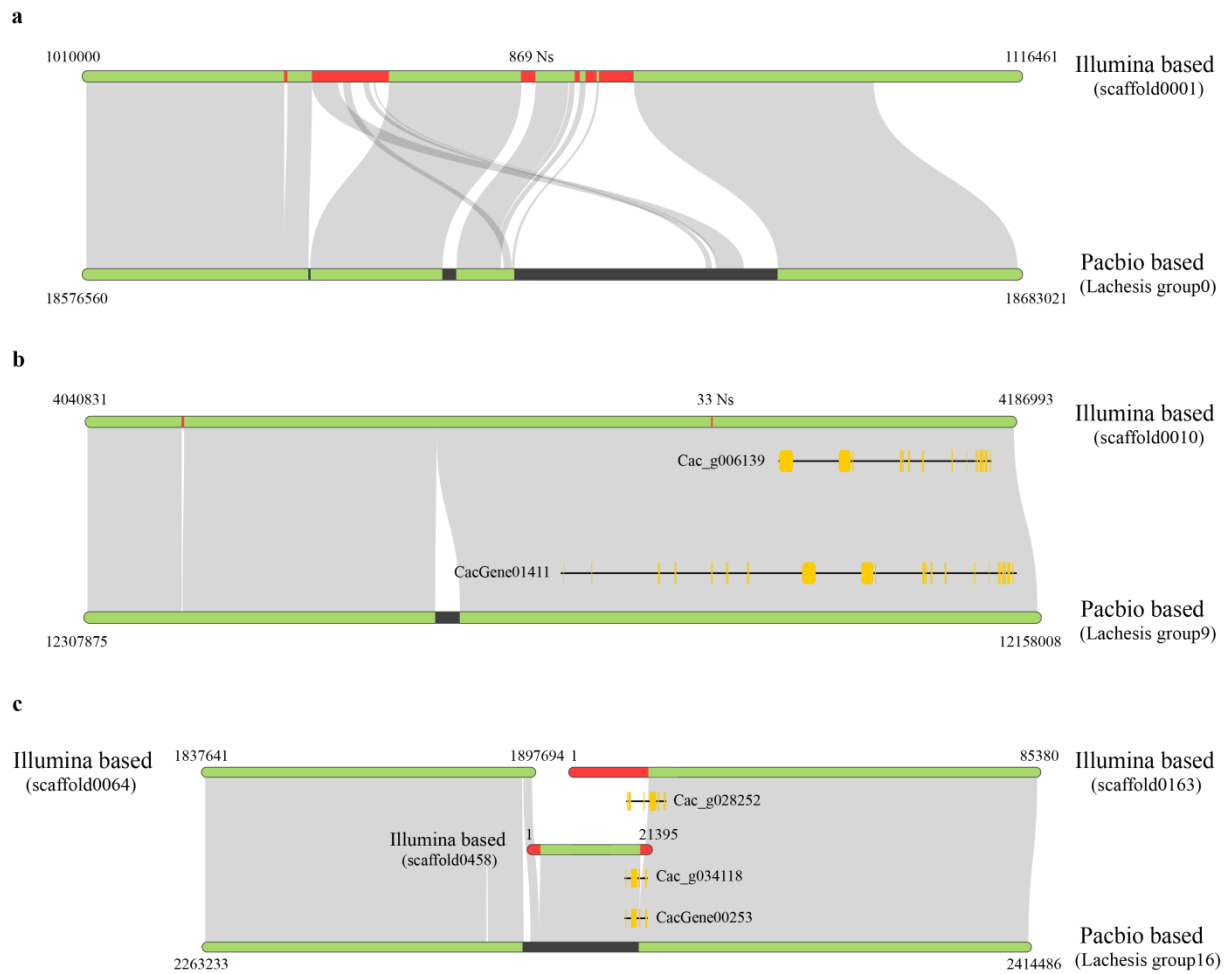

**Supplementary Figure 5.** Comparison of two *C. acuminata* genome assemblies. **a** Summary comparison of the Illumina-based and PacBio-based *C. acuminata* assemblies, showing the PacBio-based genome filled the gaps and correcting erroneous assembly (black) comparing with the Illumina-based sequences (red). **b-c** Comparison of the Illumina-based and PacBio-based *C. acuminata* assemblies, showing similar corrections that further lead to a correction in the protein-coding sequence prediction (yellow).

a

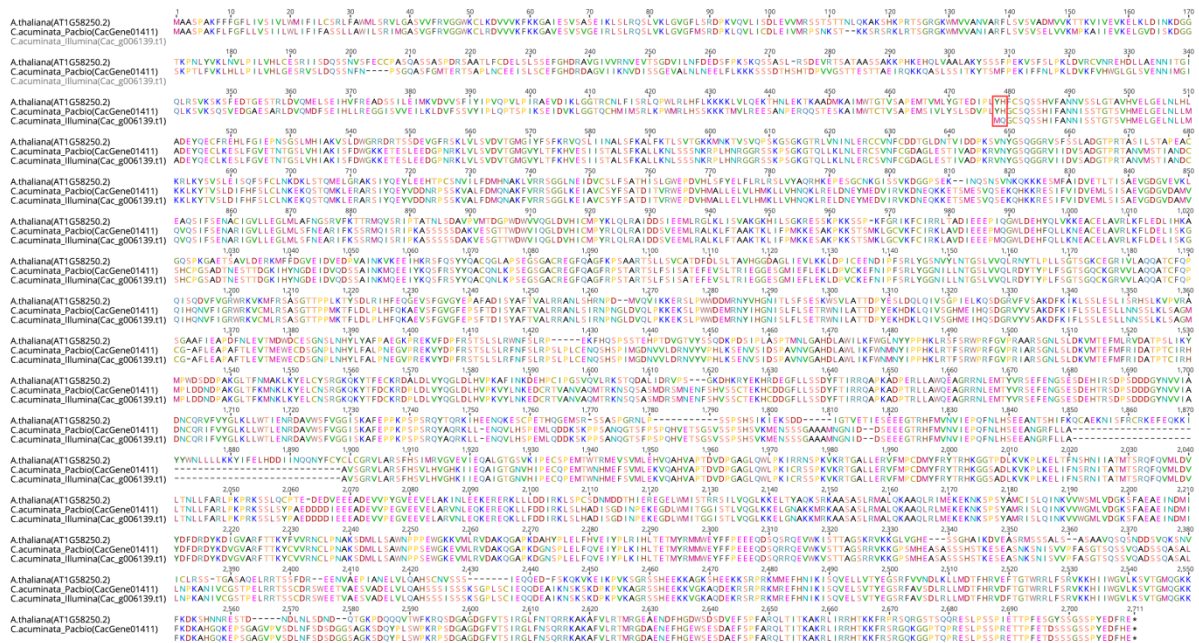

b

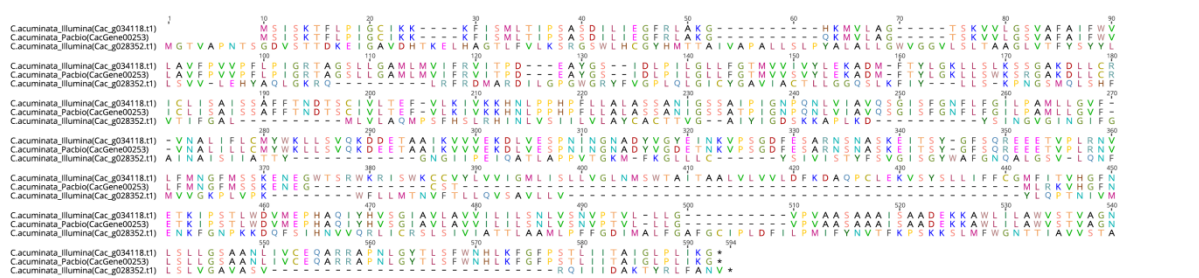

Supplementary Figure 6. Multiple sequence alignment of the proteins for the 2 assemblies in Supplementary Figure 5b and 5c. Showing corrections to the Illumina-based *C. acuminata* protein prediction by the PacBio-based assembly. AT1G58250 in a is the homolog gene of *CacGene01411* and *Cac\_g006139*.

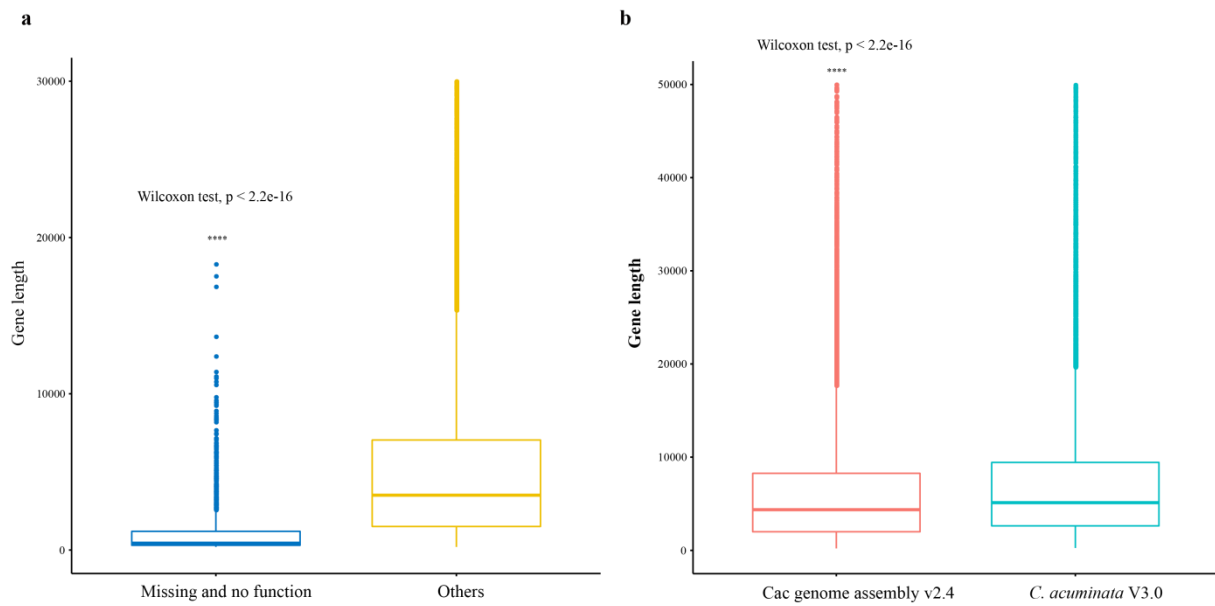

**Supplementary Figure 7.** Boxplot of protein-coding genes may have wrong structure annotation in Cac genome assembly v2.4 compare with *C. acuminata* V3.0. **a** Possible falsely annotated genes ( $n = 2,273$ ) compare with other genes ( $n = 29,588$ ) in Cac genome assembly v2.4 (significance tested by two-tailed Wilcoxon method with  $W = 9359427$ ,  $p\text{-value} = 0 < 2.2e^{-16}$ ); **b** Possible partially annotated genes in Cac genome assembly v2.4 compare with their 1:1 ortholog genes in *C. acuminata* V3.0 (both  $n = 18,116$ , significance tested by two-tailed Wilcoxon method with  $W = 181717587$ ,  $p\text{-value} = 3.959343e-70 < 2.2e^{-16}$ ). In **a-b** data are represented as boxplots where the middle line is the median, the lower and upper hinges correspond to the first and third quartiles, the upper whisker extends from the hinge to the largest value no further than  $1.5 \times \text{IQR}$  from the hinge (where IQR is the inter-quartile range) and the lower whisker extends from the hinge to the smallest value at most  $1.5 \times \text{IQR}$  of the hinge, while data beyond the end of the whiskers are outlying points that are plotted individually. Source data are provided as a Source data file.



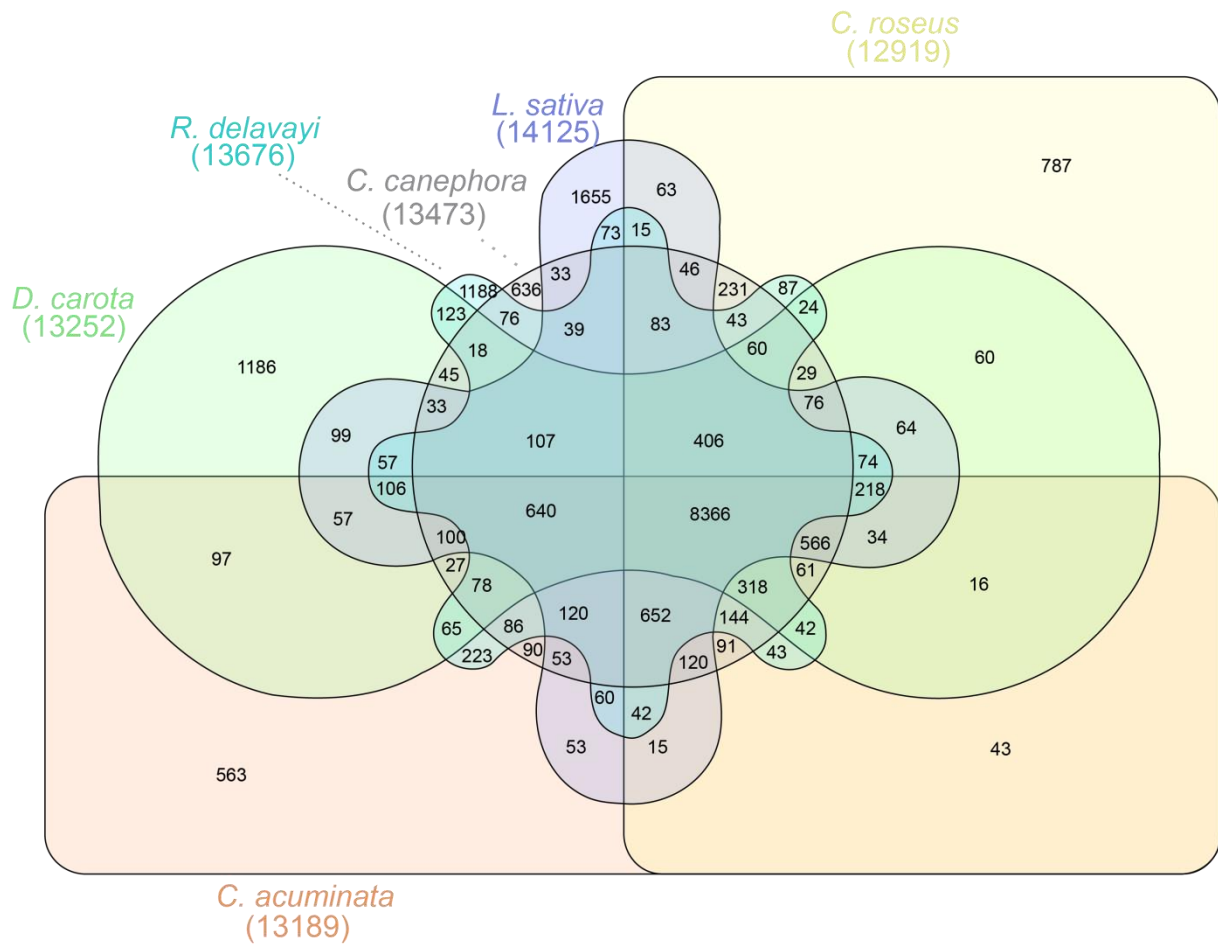

**Supplementary Figure 8.** Shared and unique gene families. Venn diagram representation of shared/unique gene families among *C. acuminata*, *R. delavayi*, *C. roseus*, *C. canephora*, *D. carota* and *L. sativa*. Only the numbers of gene families that have at least two members from either different species or the same species were shown here. Venn diagram generated by <http://www.interactivenn.net/>. Source data are provided as a Source data file.

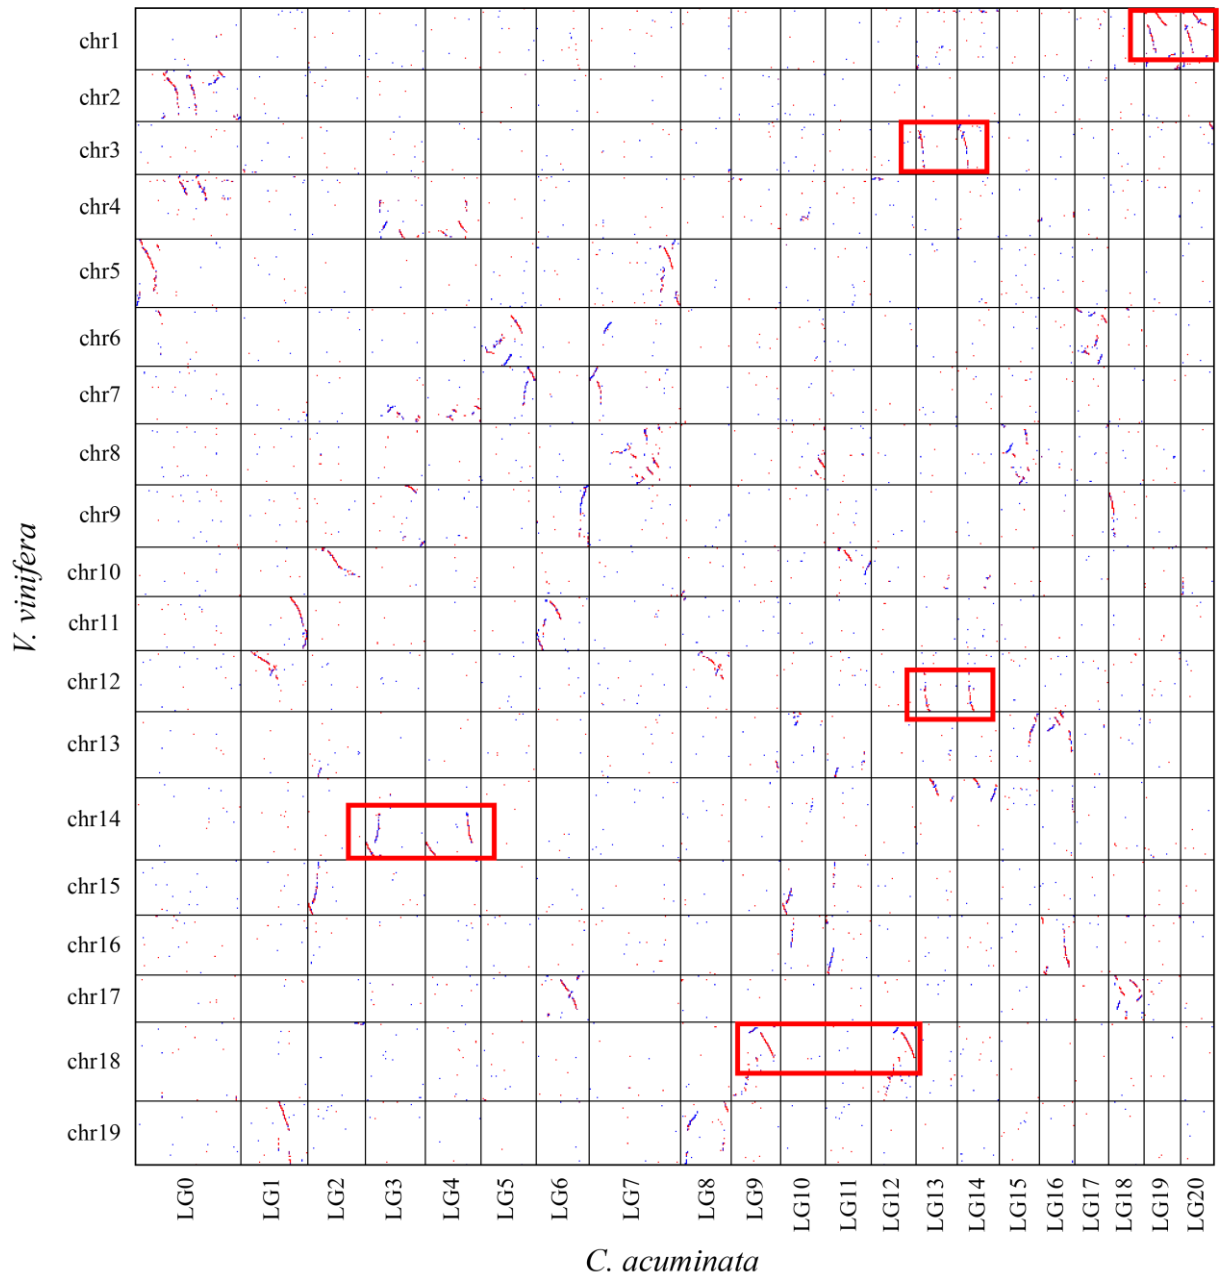

**Supplementary Figure 9.** Dot plot illustrating the comparative analysis of the *C. acuminata* and *V. vinifera* genomes. The red rectangles highlight several major duplication event, the dots represent the genome sequences' synteny detected by last v963.

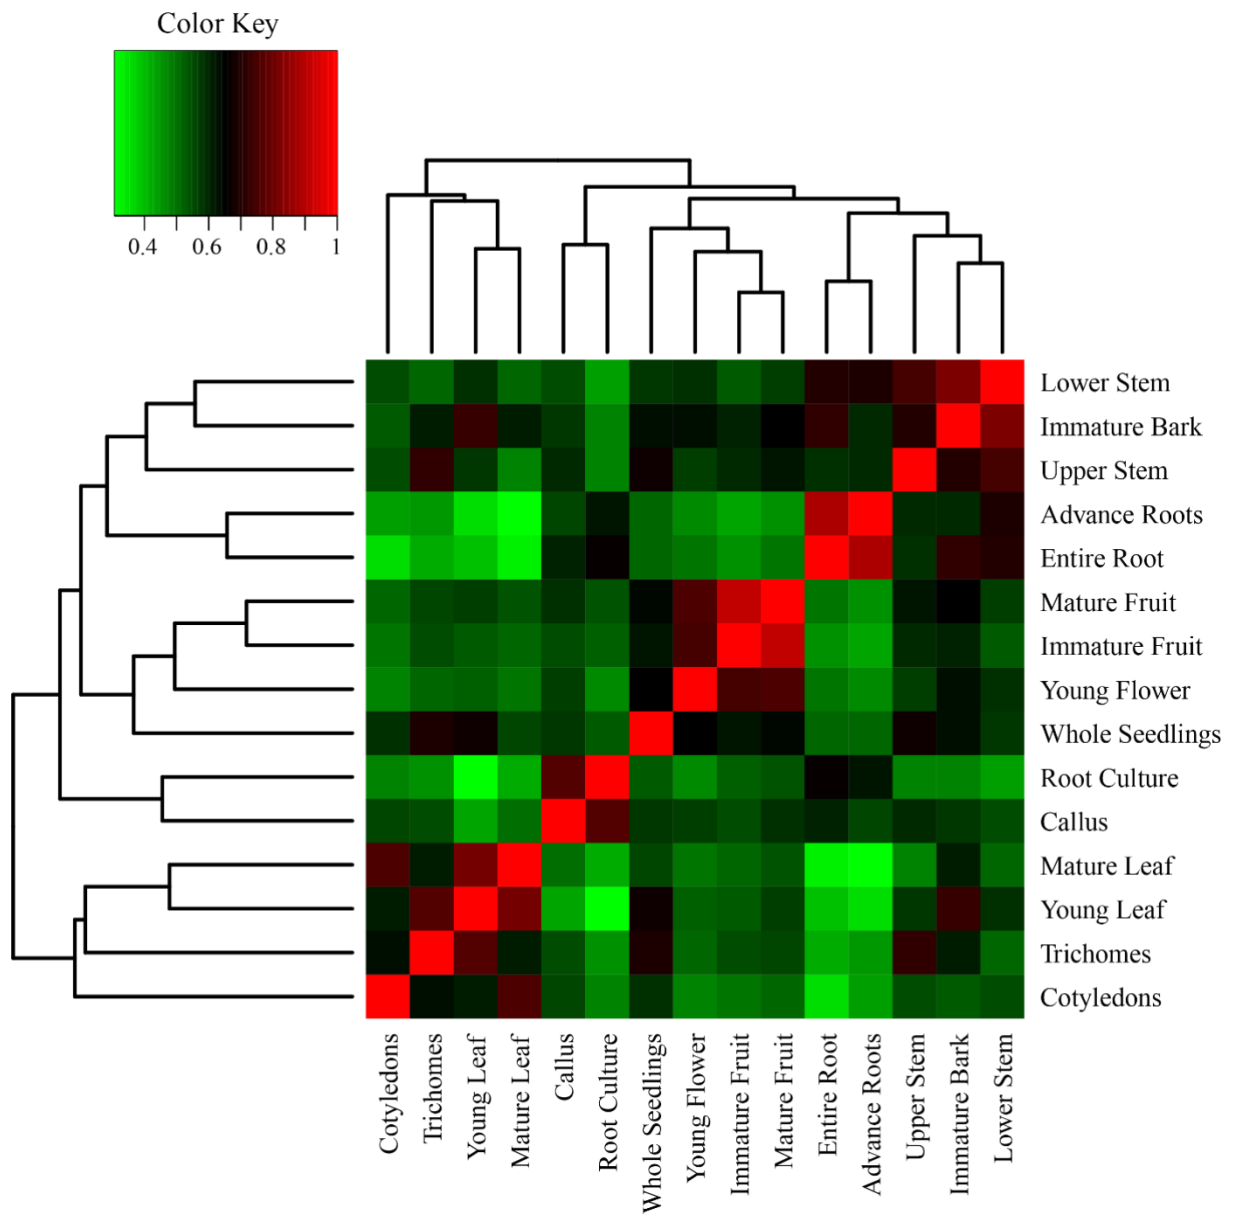

**Supplementary Figure 10.** Heat-map of differential expression among 15 tissues of *C. acuminata*.

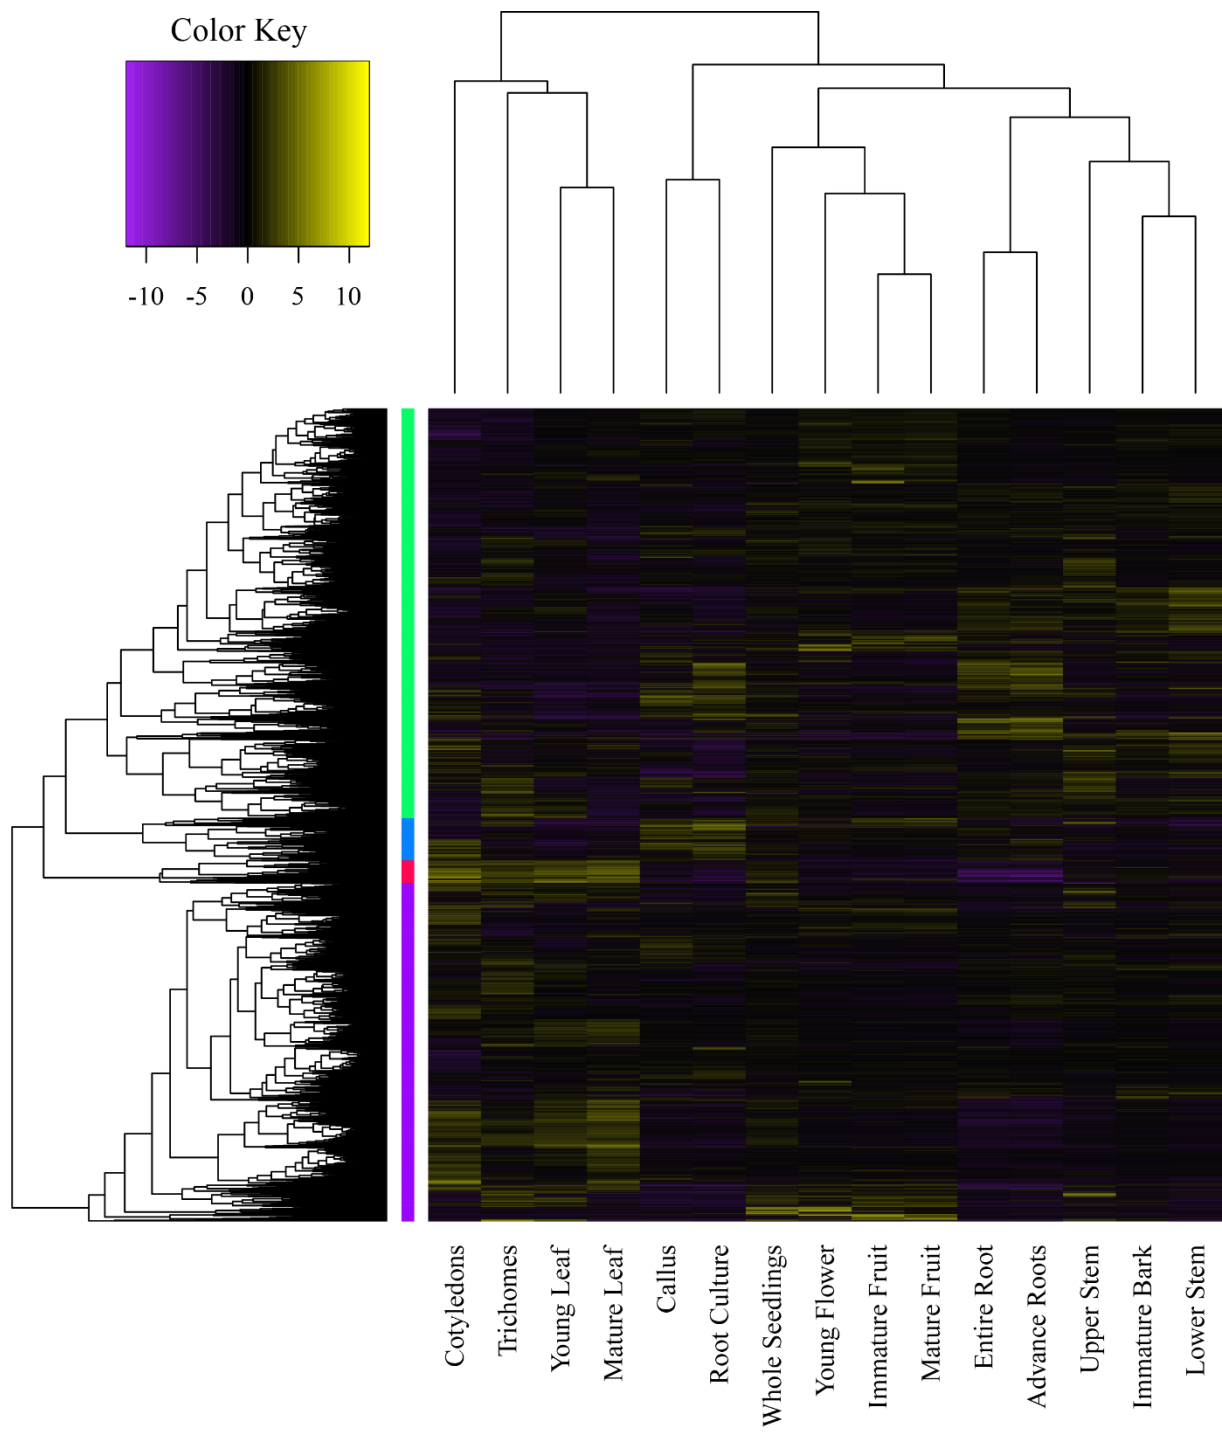

**Supplementary Figure 11.** Heat-map of differential expressed genes of *C. acuminata*.

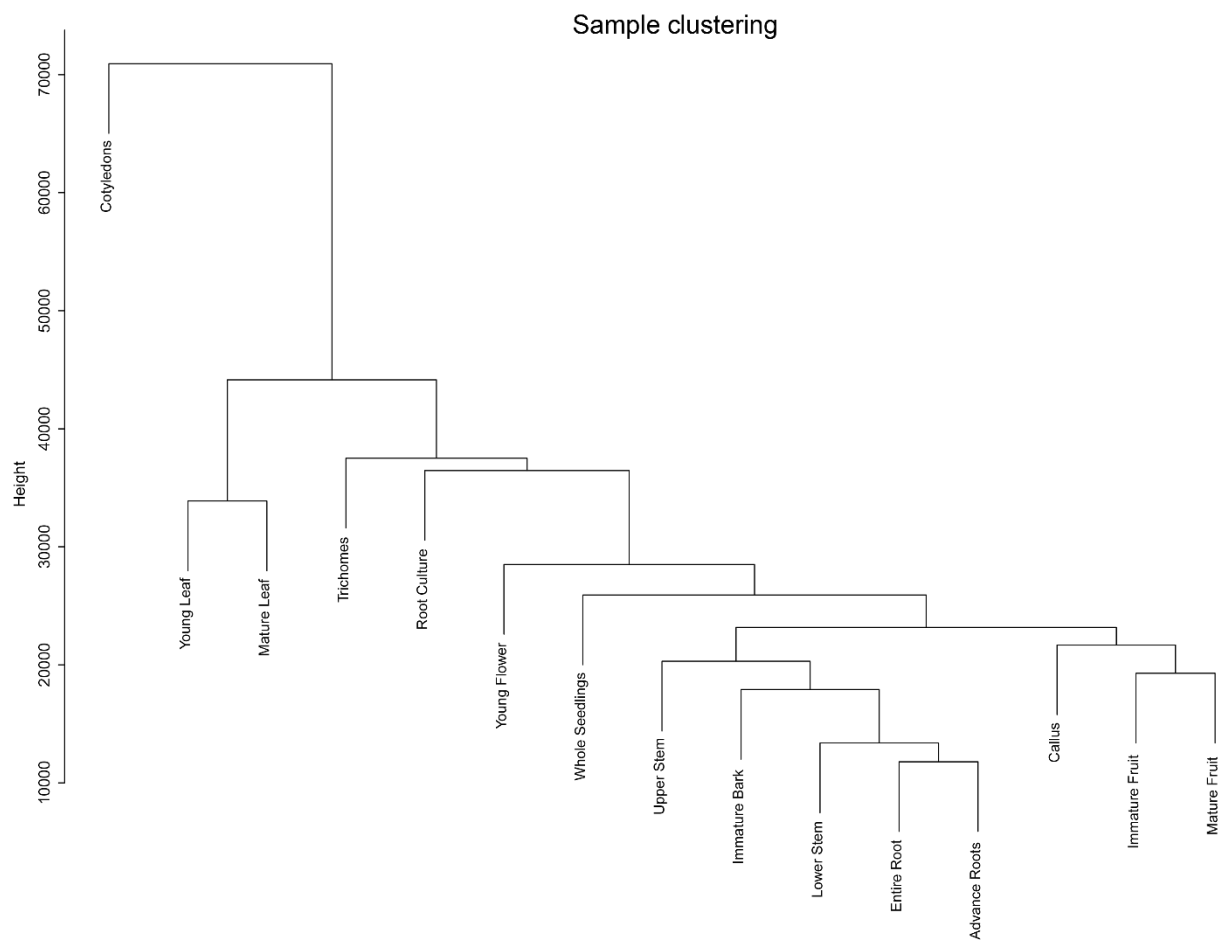

**Supplementary Figure 12.** Sample clustering for different tissues from WGCNA.

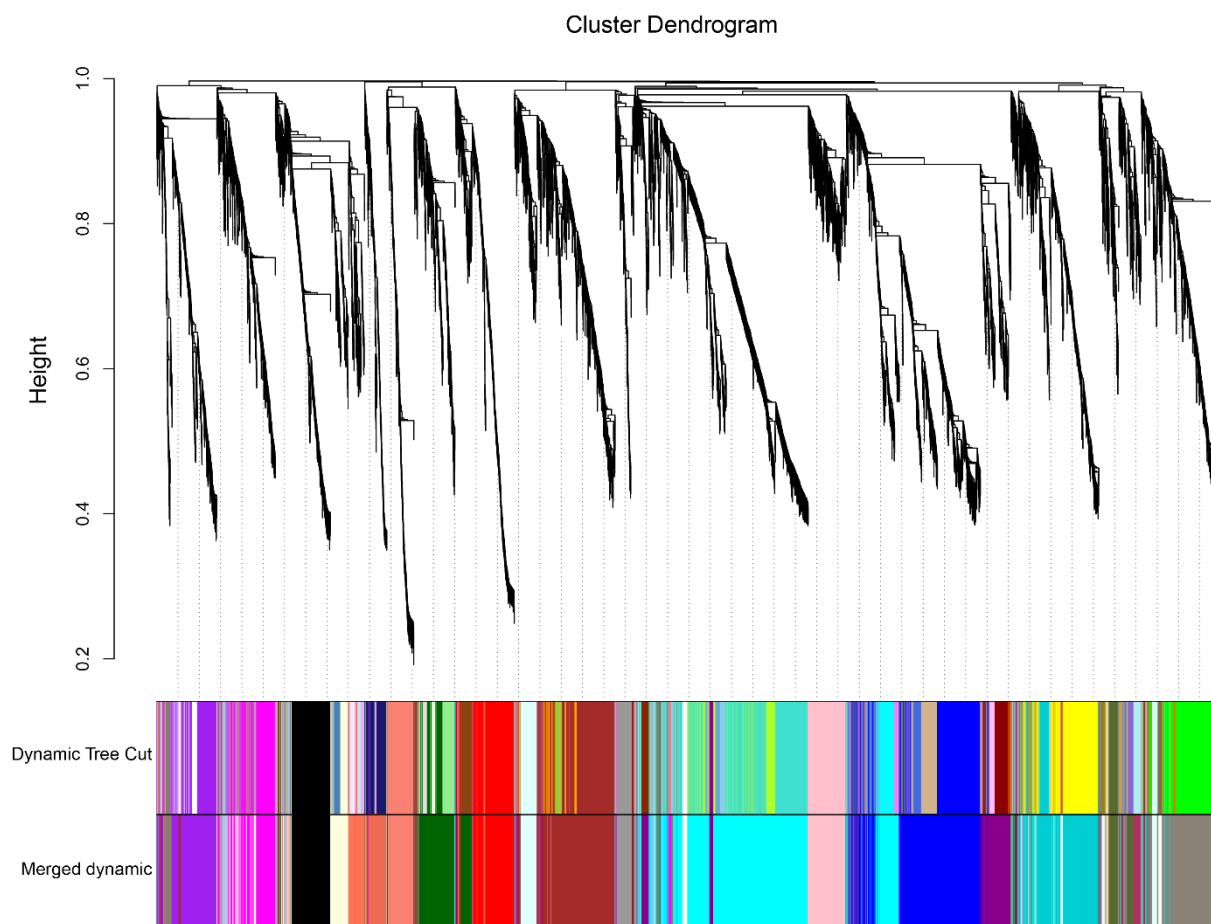

**Supplementary Figure 13.** Clustering dendrogram of differential expressed genes together with assigned merged module colours and the original module colours. The different colours under the dendrogram show co-expression modules identified using WGCNA. Some key genes in indole alkaloid biosynthetic pathway were assigned to the module with grey60 color.

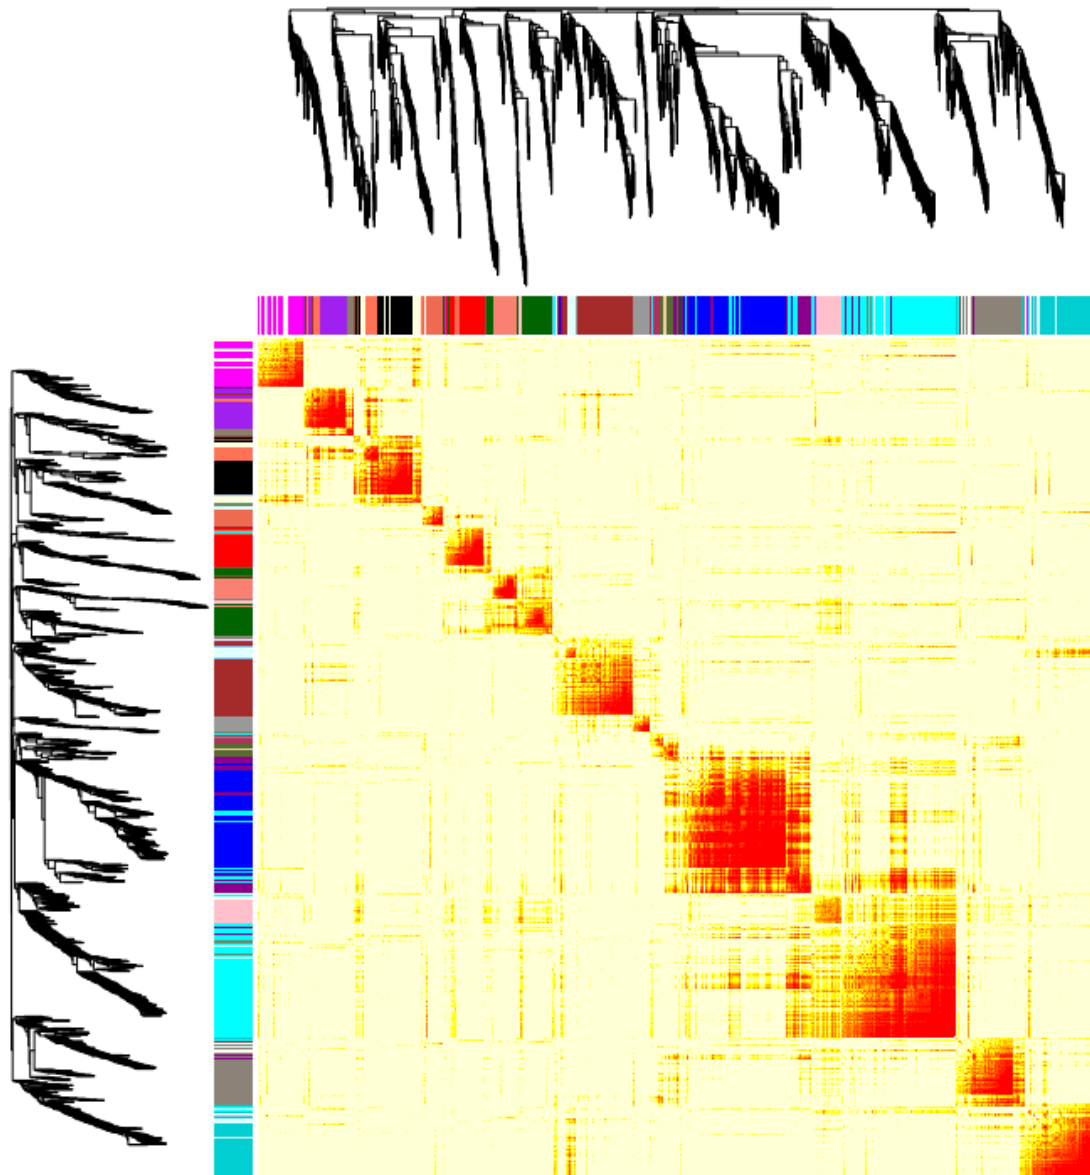

**Supplementary Figure 14.** Heatmap of the gene network using Topological Overlap Matrix among all differential expressed genes identified from different tissues. The left side and the top represent the gene dendrogram and module. The colour bar that next to the dendrogram shows the co-expressed modules.

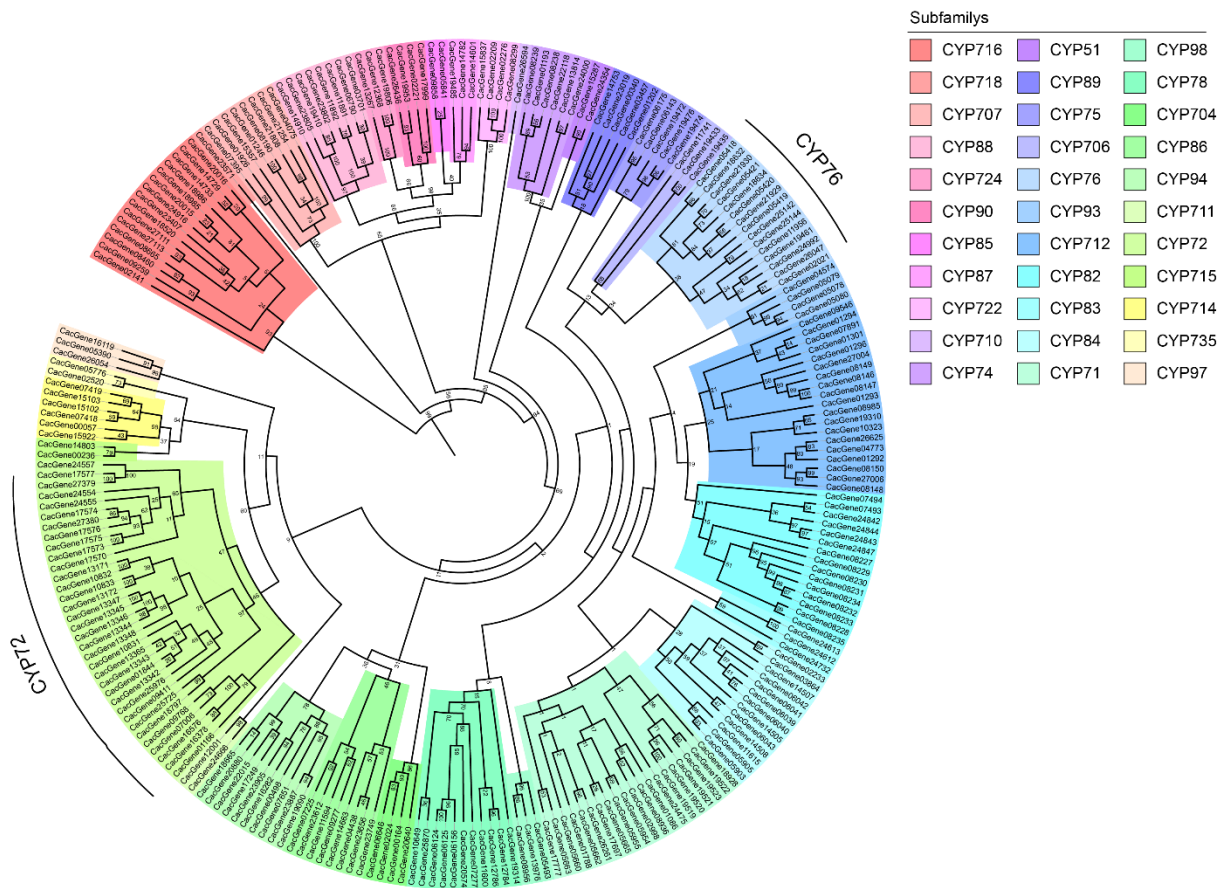

**Supplementary Figure 15.** Phylogenetic tree of the candidate CYP450 enzyme encoding genes identified in *C. acuminata* genome. Different colors indicate different CYP450 family members classified based on the protein domain annotation, homolog searching by *A. thaliana* and SwissProt protein database. Families which confirming involved in camptothecin biosynthesis previously were marked by arcs.



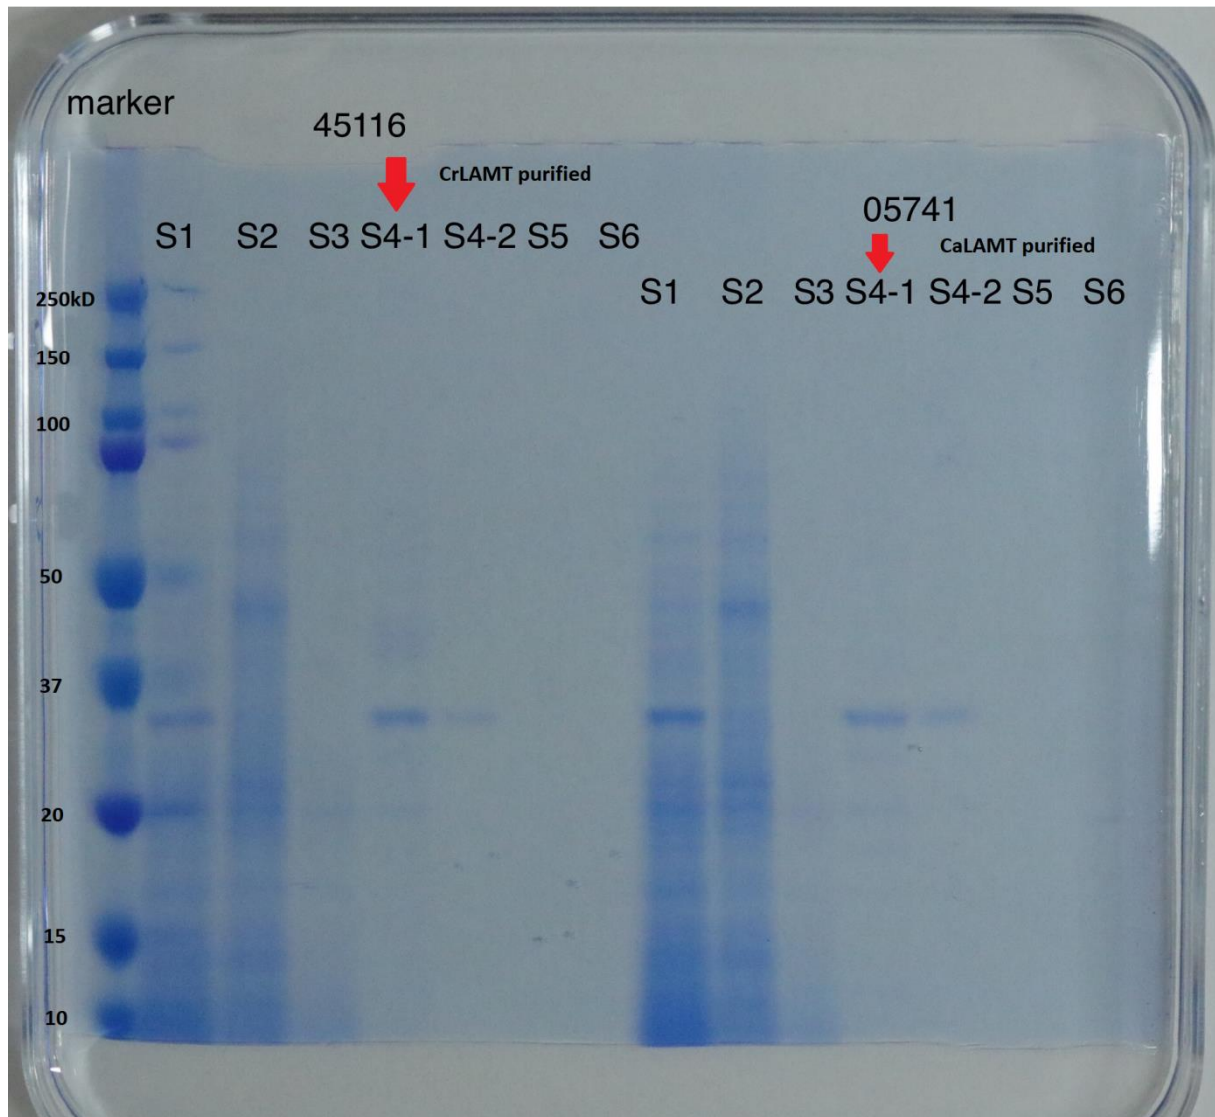

**Supplementary Figure 16.** SDS-PAGE of purified CrLAMT and CaLAMT. Line of the two purified proteins were highlighted by the red arrows. The experiment was repeated with similar results in line S4-1 and S4-2 respectively.

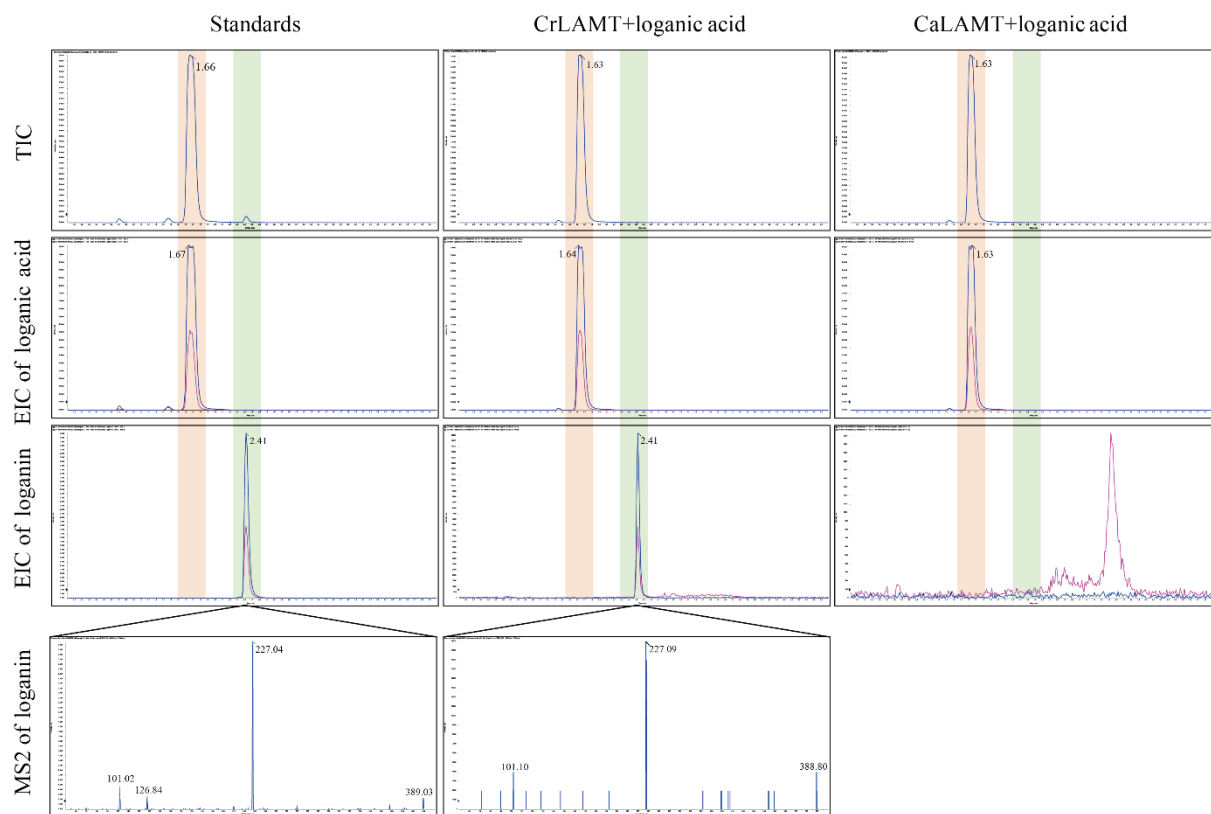

**Supplementary Figure 17.** Conversion reactions from loganic acid to loganin by CrLAMT and CaLAMT. TIC: Total Ion Chromatography, EIC: extracted ion chromatography. For MS2 model, the daughter ions of loganin ( $m/z$ , 389.2) was scanned between 50-400.

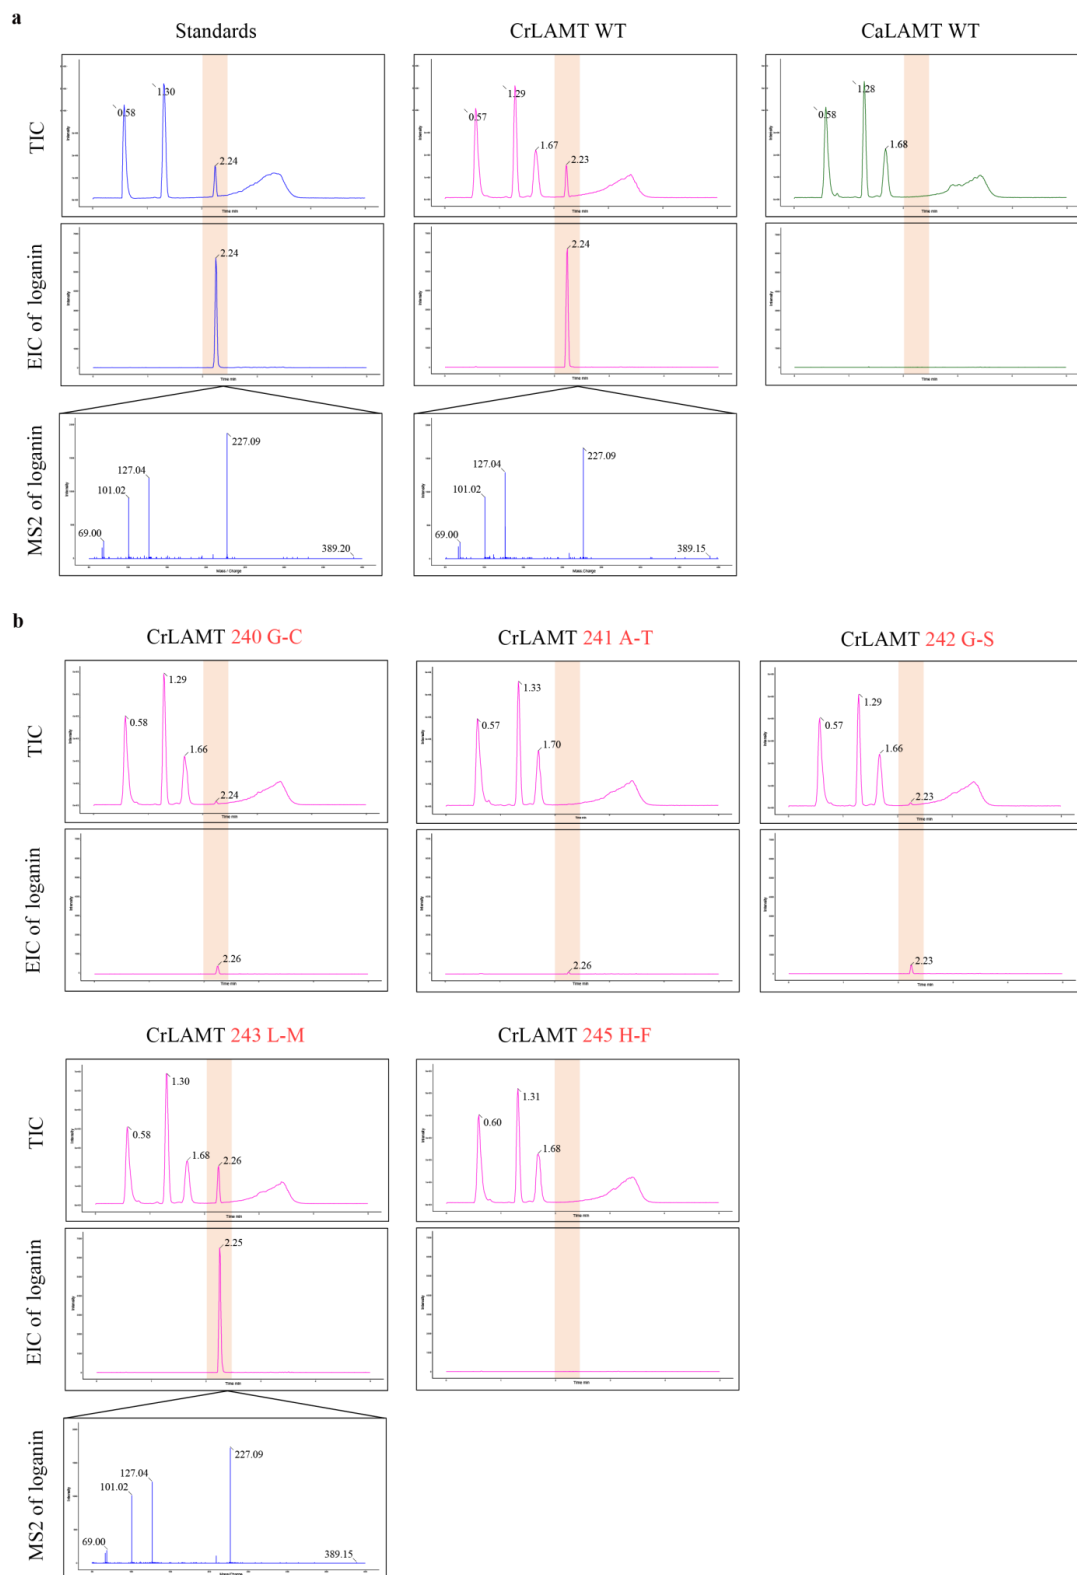

**Supplementary Figure 18.** Conversion reactions from loganic acid to loganin by CrLAMT WT, CaLAMT WT (**a**) and the CrLAMT mutants (**b**). TIC: Total Ion Chromatography, EIC: extracted ion chromatography. For MS2 model, the daughter ions of loganin (m/z, 389.2) was scanned between 50-400.

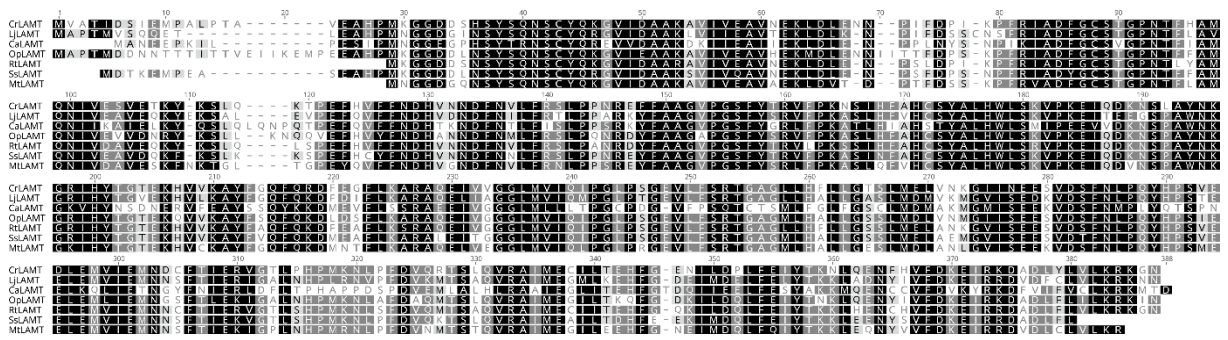

**Supplementary Figure 19.** Sequence alignment of LAMT encoding gene copies in *C. acuminata* and other species.

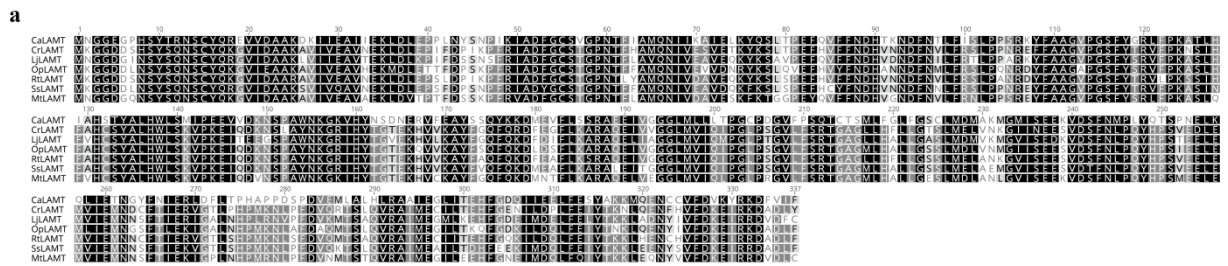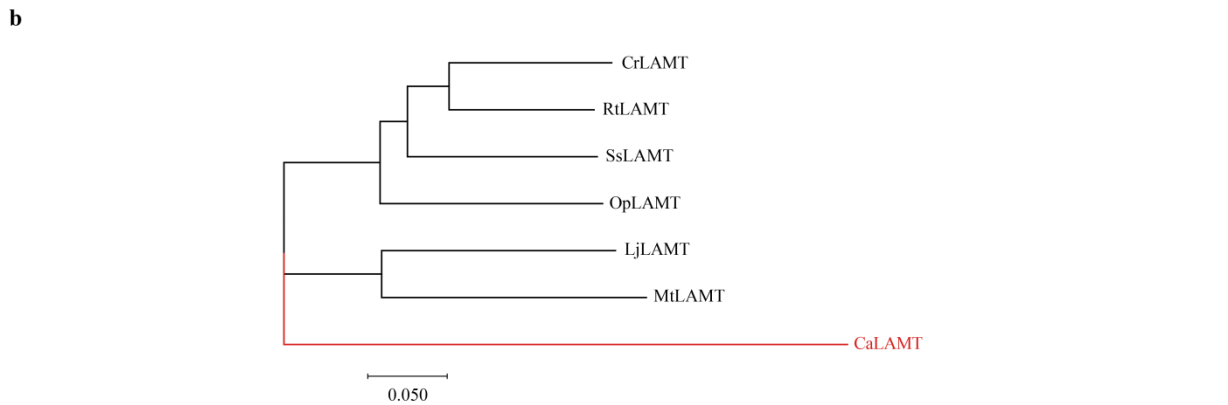

**Supplementary Figure 20.** Trimmed sequence alignment (a) and unrooted tree (b) used for selection analyses with LAMT encoding gene copies in *C. acuminata* and other species. Red indicate the foreground branches.

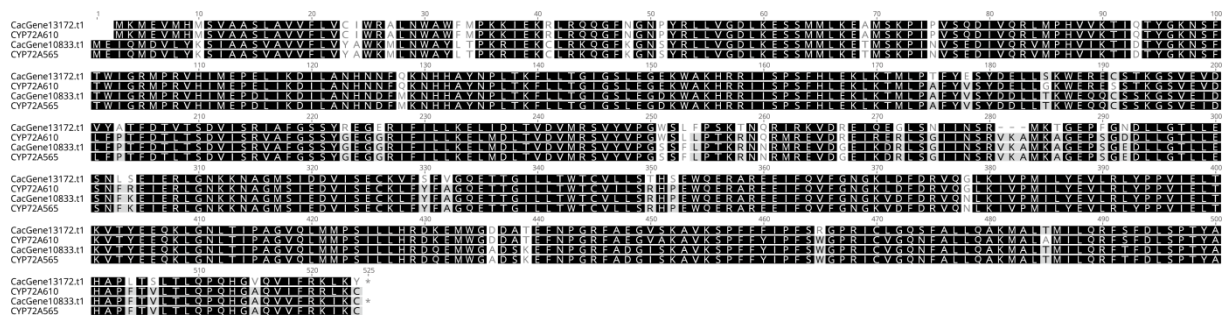

**Supplementary Figure 21.** Sequence alignment of SLAS CYP72A565 and CYP72A610 with their corresponding protein in *C. acuminata* genome assembly V3.0.

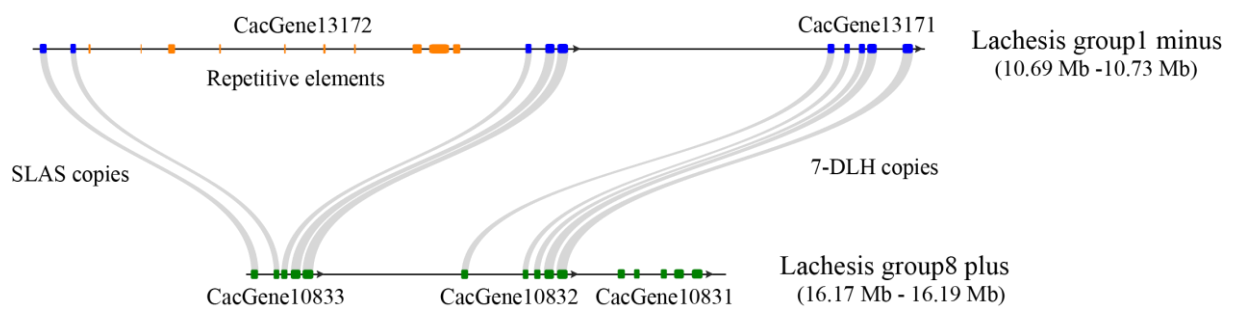

**Supplementary Figure 22.** Location and collinear relationship of 7-DLH and SLAS encoding gene copies in *C. acuminata* genome assembly V3.0.

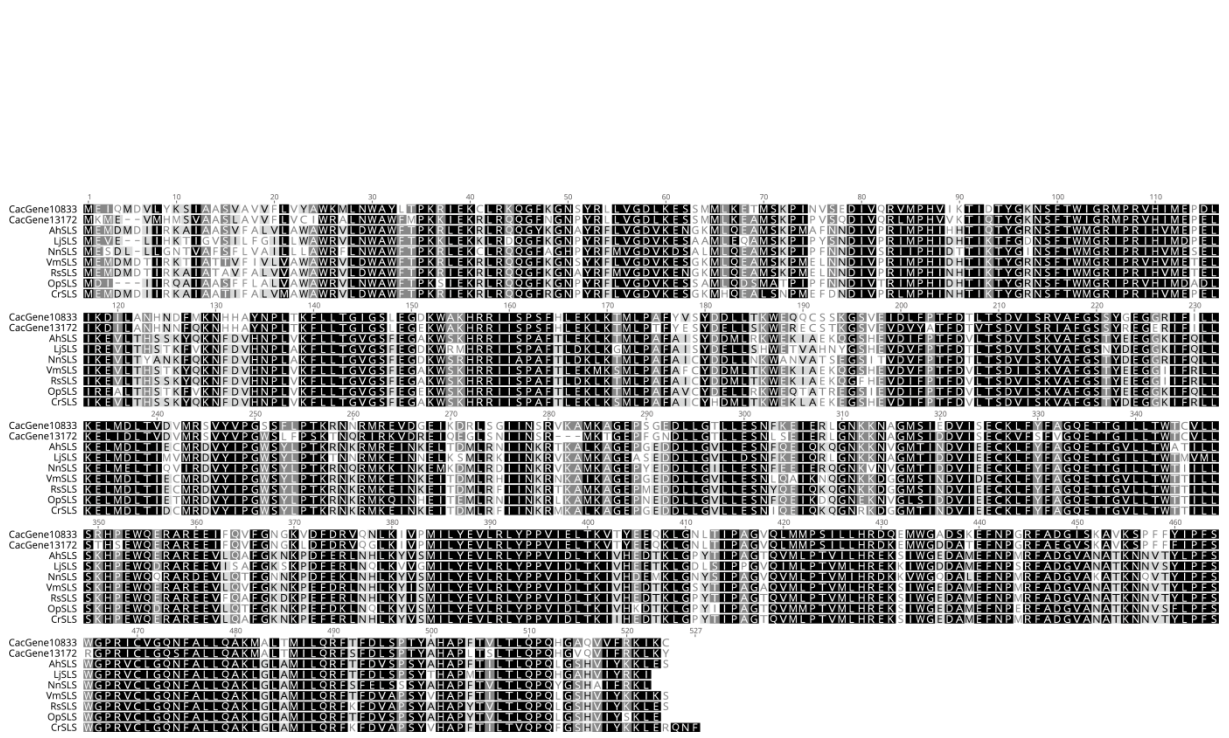

**Supplementary Figure 23.** Sequence alignment of SLAS encoding gene copies in *C. acuminata* with SLS-like encoding genes in other species.

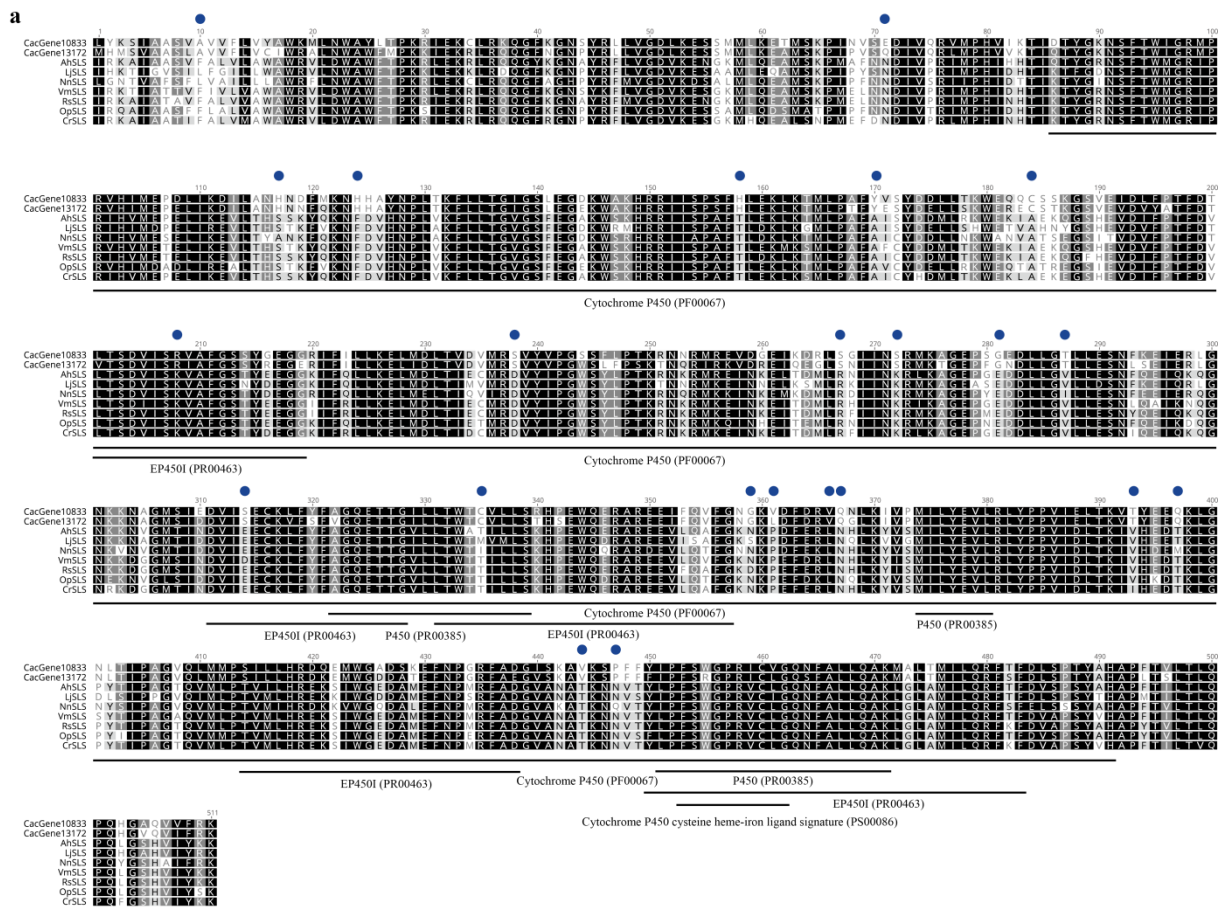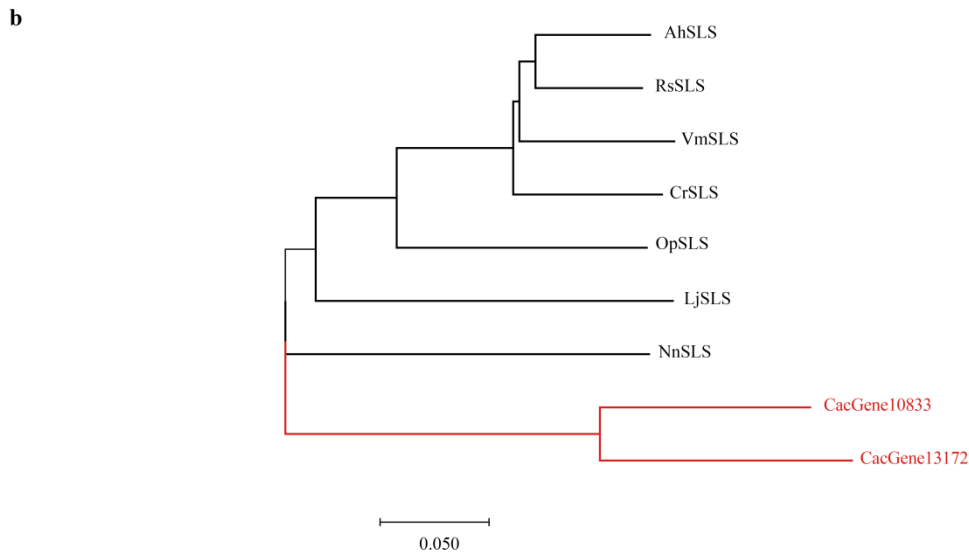

**Supplementary Figure 24.** Trimmed sequence alignment (a) and unrooted tree (b) used for selection analyses in SLAS encoding gene copies in *C. acuminata* and SLS-like encoding genes in other species. Red indicate the foreground branches. Positive sites were shown in blue.

**a**

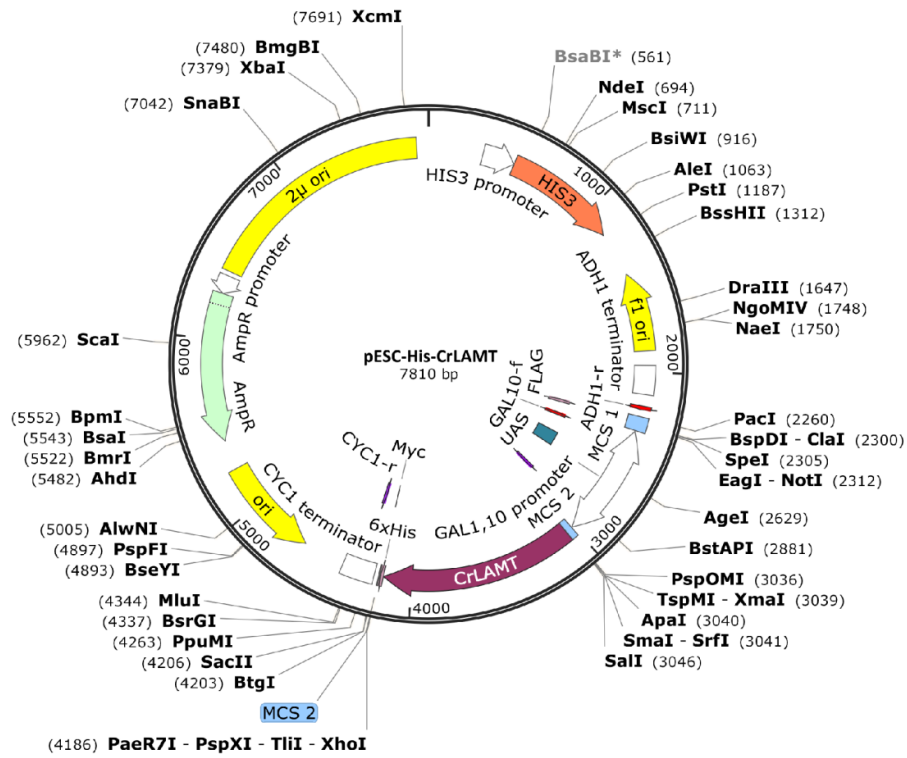

**b**

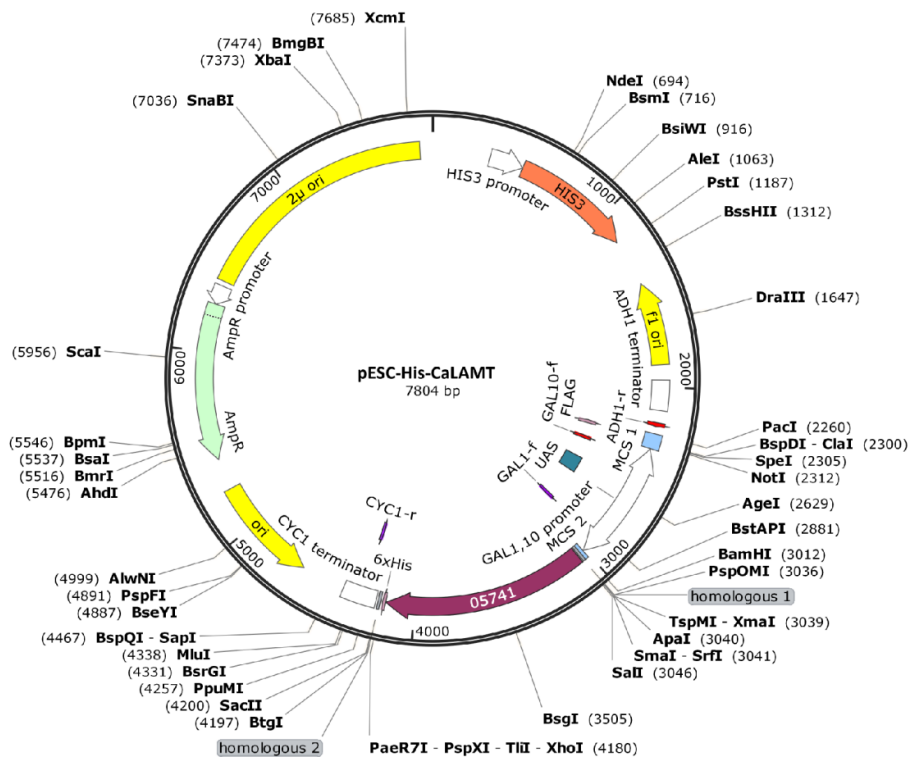

**Supplementary Figure 25.** pESC-His expression vector with His tag of (a) CrLAMT and (b) CaLAMT.



**Supplementary Table 1.** Summary of DNA sequencing data.

| Read type               | Number of clean reads / subreads | Insert size (bp) | Total data (Gb) | Read length / Mean subread length (N50) (bp) | Sequence coverage (X) <sup>1</sup> |
|-------------------------|----------------------------------|------------------|-----------------|----------------------------------------------|------------------------------------|
| Illumina pair-end reads | 158,859,043                      | 350              | 47.66           | 2 x 150                                      | 118.18                             |
| Hi-C pair-end reads     | 197,679,512                      | 300              | 59.30           | 2 x 150                                      | 146.45                             |
| Pacbio subreads         | 5,556,300                        | -                | 41.35           | 7,442 (10,334)                               | 102.11                             |

<sup>1</sup>Depth was calculated under the estimate of a genome size of 404.95Mb.

**Supplementary Table 2.** Statistics of reads mapping rate and coverage of *C. acuminata* V3.0 genome assembly.

|        |                       | Percentage (%) |
|--------|-----------------------|----------------|
| Reads  | Mapping rate          | 94.84          |
| Genome | Coverage              | 95.71          |
|        | Coverage at least 4X  | 91.31          |
|        | Coverage at least 10X | 86.62          |
|        | Coverage at least 20X | 80.85          |

**Supplementary Table 3.** K-mer analysis of the *C. acuminata* V3.0 genome by using K-mer=17.

| K-mer | K-mer number   | K-mer depth (X) | Genome size (Mb) | Revised genome size (Mb) | Heterozygous ratio(%) | Repeat(%) |
|-------|----------------|-----------------|------------------|--------------------------|-----------------------|-----------|
| 17    | 29,283,188,036 | 71              | 412.44           | 404.95                   | 0.89                  | 45.20     |

**Supplementary Table 4.** Statistics of *C. acuminata* V3.0 genome after assembly by Hi-C data.

| <b>Group</b>                             | <b>Sequence number<sup>1</sup></b> | <b>Sequence length (bp)<sup>1</sup></b> |
|------------------------------------------|------------------------------------|-----------------------------------------|
| Lachesis Group 0                         | 63                                 | 40,362,105                              |
| Lachesis Group 1                         | 35                                 | 24,922,017                              |
| Lachesis Group 2                         | 43                                 | 22,233,934                              |
| Lachesis Group 3                         | 16                                 | 22,176,898                              |
| Lachesis Group 4                         | 42                                 | 21,584,715                              |
| Lachesis Group 5                         | 42                                 | 21,155,450                              |
| Lachesis Group 6                         | 24                                 | 19,901,506                              |
| Lachesis Group 7                         | 38                                 | 34,781,413                              |
| Lachesis Group 8                         | 33                                 | 18,845,215                              |
| Lachesis Group 9                         | 21                                 | 18,359,844                              |
| Lachesis Group 10                        | 50                                 | 17,246,343                              |
| Lachesis Group 11                        | 25                                 | 17,184,261                              |
| Lachesis Group 12                        | 26                                 | 16,630,491                              |
| Lachesis Group 13                        | 28                                 | 15,902,045                              |
| Lachesis Group 14                        | 12                                 | 15,714,743                              |
| Lachesis Group 15                        | 41                                 | 15,587,416                              |
| Lachesis Group 16                        | 45                                 | 14,216,941                              |
| Lachesis Group 17                        | 52                                 | 14,042,992                              |
| Lachesis Group 18                        | 36                                 | 13,553,910                              |
| Lachesis Group 19                        | 14                                 | 13,406,917                              |
| Lachesis Group 20                        | 20                                 | 12,444,790                              |
| Total Sequences Clustered (%)            | 706 (62.48)                        | 410,253,946 (98.88)                     |
| Total Sequences Ordered and Oriented (%) | 376 (53.26)                        | 393,985,980 (96.03)                     |

<sup>1</sup>Sequence number and length was calculated with all clustered sequences > 1 Kb.

**Supplementary Table 5.** Benchmarking Universal Single-Copy Orthologs (BUSCO) analysis about Cac genome assembly v2.4 and *C. acuminata* V3.0.

|                          | <b>Total BUSCO groups searched</b> | <b>Complete single-copy BUSCOs</b> | <b>Complete duplicated BUSCOs</b> | <b>Fragmented BUSCOs</b> | <b>Missing BUSCOs</b> | <b>Complete BUSCOs percentage (%)</b> |
|--------------------------|------------------------------------|------------------------------------|-----------------------------------|--------------------------|-----------------------|---------------------------------------|
| Cac genome assembly v2.4 | 1440                               | 1244                               | 104                               | 36                       | 56                    | 93.6                                  |
| <i>C. acuminata</i> V3.0 | 1440                               | 1270                               | 97                                | 21                       | 52                    | 94.9                                  |

**Supplementary Table 6.** Intact LTR-RTs identified in Cac genome assembly v2.4 and *C. acuminata* V3.0.

|                          | <b>Total intact LTR-RTs searched</b> | <b>Copia</b> | <b>Gypsy</b> | <b>Unknown</b> |
|--------------------------|--------------------------------------|--------------|--------------|----------------|
| Cac genome assembly v2.4 | 340                                  | 180          | 65           | 95             |
| <i>C. acuminata</i> V3.0 | 465                                  | 208          | 63           | 194            |

Source data are provided as a Source data file.

**Supplementary Table 7.** Classification of repetitive elements in the *C. acuminata* V3.0.

| <b>Type</b>                             | <b>Repeat size (bp)</b> | <b>number of elements</b> | <b>% of genome</b> |
|-----------------------------------------|-------------------------|---------------------------|--------------------|
| DNA                                     | 28,477,637              | 114,478                   | 6.86               |
| LINE                                    | 19,209,794              | 41,079                    | 4.63               |
| SINE                                    | 1,114,895               | 7,584                     | 0.27               |
| LTR                                     | 56,029,493              | 74,750                    | 13.50              |
| Unclassified                            | 50,997,452              | 214,155                   | 12.29              |
| Satellite                               | 47,670                  | 321                       | 0.01               |
| Simple repeats                          | 494,387                 | 2,623                     | 0.12               |
| Total interspersed repeats <sup>1</sup> | 155,829,271             | 452,046                   | 37.55              |
| Total                                   | 156,371,328             | 454,990                   | 37.68              |

<sup>1</sup>Repetitive elements for masking genome for gene prediction, expect Satellite and Simple repeats. Because these type of repetitive elements are of short length, the probability of appearing in the coding region is high.

**Supplementary Table 8.** Comparison of predicted protein-coding genes between Cac genome assembly v2.4 and *C. acuminata* V3.0.

|                                   | <b>Cac genome assembly v2.4</b> | <b><i>C. acuminata</i> V3.0</b> |
|-----------------------------------|---------------------------------|---------------------------------|
| Number of protein-coding gene     | 31,825                          | 27,940                          |
| Number of transcripts             | 40,332                          | 51,735                          |
| Average transcript length (bp)    | 6026.33                         | 8394.99                         |
| Average exon length (bp)          | 286.32                          | 269.81                          |
| Average intron length (bp)        | 1008.03                         | 1052.31                         |
| Average number of exons per gene  | 5.07                            | 6.14                            |
| Average exon length per gene (bp) | 1450.68                         | 1656.63                         |

**Supplementary Table 9.** Summary of functional annotation of predicted genes for *C. acuminata* V3.0.

|                        | <b>Numbers of matching genes</b> | <b>Percent of annotated genes (%)</b> |
|------------------------|----------------------------------|---------------------------------------|
| Total                  | 27,940                           | 100                                   |
| SwissProt              | 22,121                           | 79.17                                 |
| InterPro               | 26,804                           | 95.93                                 |
| GO                     | 24,691                           | 88.38                                 |
| TrEMBL                 | 26,036                           | 93.19                                 |
| KEGG Pathway           | 9,320                            | 33.36                                 |
| Annotated <sup>1</sup> | 27,122                           | 97.07                                 |
| Unannotated            | 818                              | 2.93                                  |

<sup>1</sup>At least one match in either of database above.

**Supplementary Table 10.** Summary of gene family clustering.

| <b>Species</b>      | <b>Total genes</b> | <b>Genes in families</b> | <b>Family</b> | <b>Unclustered genes</b> | <b>Unique families</b> | <b>Genes per family</b> |
|---------------------|--------------------|--------------------------|---------------|--------------------------|------------------------|-------------------------|
| <i>A. thaliana</i>  | 27,416             | 23,178                   | 12,561        | 4,238                    | 825                    | 1.85                    |
| <i>C. acuminata</i> | 27,940             | 23,047                   | 13,188        | 4,893                    | 413                    | 1.75                    |
| <i>C. roseus</i>    | 33,829             | 27,640                   | 12,919        | 6,189                    | 728                    | 2.14                    |
| <i>C. canephora</i> | 25,574             | 20,890                   | 13,473        | 4,684                    | 537                    | 1.55                    |
| <i>D. carota</i>    | 32,113             | 26,088                   | 13,252        | 6,025                    | 1105                   | 1.97                    |
| <i>L. sativa</i>    | 38,910             | 30,339                   | 14,125        | 8,571                    | 1593                   | 2.15                    |
| <i>R. delavayi</i>  | 32,938             | 25,391                   | 13,676        | 7,547                    | 1104                   | 1.86                    |
| <i>V. vinifera</i>  | 26,346             | 19,275                   | 12,636        | 7,071                    | 627                    | 1.53                    |

Source data are provided as a Source data file.

**Supplementary Table 11.** GO enrichment analysis of species-specific genes in the *C. acuminata* genome. Significance was tested by two tailed Fisher's exact test method.

| GO ID      | GO name                                                            | GO category | FDR      | <i>p</i> -value | Number of genes |
|------------|--------------------------------------------------------------------|-------------|----------|-----------------|-----------------|
| GO:0015462 | ATPase-coupled protein transmembrane transporter activity          | MF          | 4.44E-32 | 4.43E-36        | 29              |
| GO:1902039 | negative regulation of seed dormancy process                       | BP          | 2.03E-21 | 4.06E-25        | 26              |
| GO:0004252 | serine-type endopeptidase activity                                 | MF          | 5.03E-21 | 1.51E-24        | 48              |
| GO:0010205 | photoinhibition                                                    | BP          | 3.40E-17 | 1.70E-20        | 26              |
| GO:0010360 | negative regulation of anion channel activity                      | BP          | 6.57E-17 | 4.26E-20        | 26              |
| GO:0048838 | release of seed from dormancy                                      | BP          | 3.21E-16 | 2.40E-19        | 26              |
| GO:0015074 | DNA integration                                                    | BP          | 9.35E-16 | 7.46E-19        | 35              |
| GO:0009939 | positive regulation of gibberellic acid mediated signaling pathway | BP          | 1.20E-14 | 1.08E-17        | 26              |
| GO:0043531 | ADP binding                                                        | MF          | 2.02E-14 | 2.01E-17        | 66              |
| GO:0009658 | chloroplast organization                                           | BP          | 2.74E-11 | 4.10E-14        | 68              |
| GO:0002238 | response to molecule of fungal origin                              | BP          | 3.26E-11 | 5.05E-14        | 42              |
| GO:0043952 | protein transport by the Sec complex                               | BP          | 3.68E-11 | 5.88E-14        | 10              |
| GO:0002230 | positive regulation of defense response to virus by host           | BP          | 7.09E-10 | 1.17E-12        | 27              |
| GO:0015066 | alpha-amylase inhibitor activity                                   | MF          | 5.95E-07 | 1.33E-09        | 9               |
| GO:0009626 | plant-type hypersensitive response                                 | BP          | 9.81E-07 | 2.25E-09        | 63              |
| GO:1902456 | regulation of stomatal opening                                     | BP          | 1.73E-06 | 4.40E-09        | 26              |
| GO:0010030 | positive regulation of seed germination                            | BP          | 1.87E-06 | 4.95E-09        | 26              |
| GO:0006469 | negative regulation of protein kinase activity                     | BP          | 2.65E-06 | 7.94E-09        | 27              |
| GO:0008126 | acetyltransferase activity                                         | MF          | 9.36E-06 | 2.99E-08        | 12              |
| GO:0050285 | sinapine esterase activity                                         | MF          | 1.09E-05 | 3.60E-08        | 13              |
| GO:0004722 | protein serine/threonine                                           | MF          | 1.35E-05 | 4.66E-08        | 29              |

| phosphatase activity |                                                         |    |          |          |    |
|----------------------|---------------------------------------------------------|----|----------|----------|----|
| GO:0003144           | embryonic heart tube formation                          | BP | 1.94E-05 | 7.54E-08 | 5  |
| GO:1901202           | negative regulation of<br>extracellular matrix assembly | BP | 1.94E-05 | 7.54E-08 | 5  |
| GO:0007505           | adult fat body development                              | BP | 1.94E-05 | 7.54E-08 | 5  |
| GO:0007561           | imaginal disc eversion                                  | BP | 1.94E-05 | 7.54E-08 | 5  |
| GO:0034769           | basement membrane<br>disassembly                        | BP | 1.94E-05 | 7.54E-08 | 5  |
| GO:0097156           | fasciculation of motor neuron<br>axon                   | BP | 1.94E-05 | 7.54E-08 | 5  |
| GO:0035202           | tracheal pit formation in open<br>tracheal system       | BP | 1.94E-05 | 7.54E-08 | 5  |
| GO:0103115           | protoheme IX ABC transporter<br>activity                | MF | 5.33E-05 | 2.15E-07 | 6  |
| GO:0030247           | polysaccharide binding                                  | MF | 7.58E-05 | 3.22E-07 | 34 |

---

**Supplementary Table 12.** Summary of the gene classification of all genes and genes in the expanded gene families in *C. acuminata* genome.

|                  | <b>All genes</b> | <b>Percentage (%)</b> | <b>Genes in the<br/>expanded gene<br/>families</b> | <b>Percentage (%)</b> |
|------------------|------------------|-----------------------|----------------------------------------------------|-----------------------|
| Total            | 27,940           | 100                   | 9,249                                              | 100                   |
| Singleton        | 3,655            | 13.08                 | 32                                                 | 0.34                  |
| Dispersed        | 4,660            | 16.68                 | 810                                                | 8.76                  |
| Proximal         | 844              | 3.02                  | 253                                                | 2.74                  |
| Tandem           | 1,768            | 6.33                  | 695                                                | 7.51                  |
| WGD or segmental | 17,013           | 60.89                 | 7,458                                              | 80.64                 |



**Supplementary Table 13.** GO enrichment analysis of expanded gene families in the *C. acuminata* genome. Significance was tested by two tailed Fisher's exact test method.

| GO ID      | GO name                                                           | GO category | FDR      | <i>p</i> -value | Number of genes |
|------------|-------------------------------------------------------------------|-------------|----------|-----------------|-----------------|
| GO:0010200 | response to chitin                                                | BP          | 1.67E-24 | 9.61E-27        | 570             |
| GO:0009911 | positive regulation of flower development                         | BP          | 5.18E-21 | 3.72E-23        | 248             |
| GO:0042803 | protein homodimerization activity                                 | MF          | 1.33E-18 | 1.16E-20        | 859             |
| GO:0010268 | brassinosteroid homeostasis                                       | BP          | 2.10E-15 | 2.23E-17        | 128             |
| GO:0080092 | regulation of pollen tube growth                                  | BP          | 3.56E-15 | 3.84E-17        | 138             |
| GO:0005509 | calcium ion binding                                               | MF          | 2.54E-14 | 3.10E-16        | 364             |
| GO:0033466 | trans-zeatin biosynthetic process                                 | BP          | 8.35E-14 | 1.08E-15        | 39              |
| GO:0016185 | synaptic vesicle budding from presynaptic endocytic zone membrane | BP          | 1.46E-12 | 2.15E-14        | 44              |
| GO:0005388 | calcium-transporting ATPase activity                              | MF          | 1.82E-12 | 2.72E-14        | 40              |
| GO:0050616 | secologanin synthase activity                                     | MF          | 2.71E-11 | 4.60E-13        | 35              |
| GO:0008395 | steroid hydroxylase activity                                      | MF          | 4.84E-11 | 8.53E-13        | 56              |
| GO:0009846 | pollen germination                                                | BP          | 8.08E-11 | 1.47E-12        | 155             |
| GO:0042538 | hyperosmotic salinity response                                    | BP          | 8.12E-11 | 1.48E-12        | 230             |
| GO:0046777 | protein autophosphorylation                                       | BP          | 1.21E-10 | 2.27E-12        | 591             |
| GO:0016760 | cellulose synthase (UDP-forming) activity                         | MF          | 1.31E-10 | 2.47E-12        | 42              |
| GO:1902382 | 11-oxo-beta-amyrin catabolic process                              | BP          | 1.50E-10 | 2.94E-12        | 35              |
| GO:1902386 | glycyrrhetinate biosynthetic process                              | BP          | 1.50E-10 | 2.94E-12        | 35              |
| GO:0102375 | 11-oxo-beta-amyrin 30-oxidase activity                            | MF          | 1.50E-10 | 2.94E-12        | 35              |
| GO:0010400 | rhamnogalacturonan I side chain metabolic process                 | BP          | 2.87E-10 | 5.86E-12        | 41              |
| GO:0008017 | microtubule binding                                               | MF          | 3.46E-10 | 7.13E-12        | 241             |

|            |                                             |    |          |          |     |
|------------|---------------------------------------------|----|----------|----------|-----|
| GO:0048768 | root hair cell tip growth                   | BP | 3.87E-10 | 8.03E-12 | 65  |
| GO:0010305 | leaf vascular tissue pattern formation      | BP | 7.23E-10 | 1.56E-11 | 217 |
| GO:0009877 | nodulation                                  | BP | 8.09E-10 | 1.76E-11 | 143 |
| GO:0050321 | tau-protein kinase activity                 | MF | 8.85E-10 | 1.93E-11 | 29  |
| GO:0015386 | potassium:proton antiporter activity        | MF | 1.55E-09 | 3.50E-11 | 46  |
| GO:1903288 | positive regulation of potassium ion import | BP | 2.21E-09 | 5.09E-11 | 28  |
| GO:0036377 | arbuscular mycorrhizal association          | BP | 4.85E-09 | 1.17E-10 | 60  |
| GO:0003785 | actin monomer binding                       | MF | 7.23E-09 | 1.78E-10 | 37  |
| GO:0004565 | beta-galactosidase activity                 | MF | 1.07E-08 | 2.68E-10 | 52  |
| GO:0010483 | pollen tube reception                       | BP | 1.45E-08 | 3.68E-10 | 48  |

---

**Supplementary Table 14.** GO enrichment analysis of tandem repeat genes in the *C. acuminata* genome. Significance was tested by two tailed Fisher's exact test method.

| GO ID      | GO name                                                            | GO category | FDR      | <i>p</i> -value | Number of genes |
|------------|--------------------------------------------------------------------|-------------|----------|-----------------|-----------------|
| GO:0042432 | indole biosynthetic process                                        | BP          | 1.03E-47 | 8.87E-51        | 96              |
| GO:0080043 | quercetin<br>3- <i>O</i> -glucosyltransferase activity             | MF          | 6.24E-39 | 1.10E-41        | 88              |
| GO:0080044 | quercetin<br>7- <i>O</i> -glucosyltransferase activity             | MF          | 6.24E-39 | 1.10E-41        | 88              |
| GO:0009626 | plant-type hypersensitive<br>response                              | BP          | 1.44E-34 | 2.92E-37        | 197             |
| GO:0050403 | trans-zeatin<br><i>O</i> -beta-D-glucosyltransferase<br>activity   | MF          | 3.00E-33 | 7.05E-36        | 58              |
| GO:0050502 | cis-zeatin<br><i>O</i> -beta-D-glucosyltransferase<br>activity     | MF          | 7.32E-33 | 1.79E-35        | 58              |
| GO:0009718 | anthocyanin-containing<br>compound biosynthetic process            | BP          | 6.10E-28 | 1.82E-30        | 136             |
| GO:1900994 | (-)-secologanin biosynthetic<br>process                            | BP          | 2.88E-27 | 8.87E-30        | 42              |
| GO:0050057 | linamarin synthase activity                                        | MF          | 1.95E-25 | 6.44E-28        | 38              |
| GO:0080167 | response to karrikin                                               | BP          | 4.69E-25 | 1.59E-27        | 199             |
| GO:0009816 | defense response to bacterium,<br>incompatible interaction         | BP          | 2.29E-24 | 8.39E-27        | 139             |
| GO:0102425 | myricetin<br>3- <i>O</i> -glucosyltransferase activity             | MF          | 4.26E-24 | 1.62E-26        | 48              |
| GO:0102360 | daphnetin<br>3- <i>O</i> -glucosyltransferase activity             | MF          | 4.26E-24 | 1.62E-26        | 48              |
| GO:0047893 | flavonol 3- <i>O</i> -glucosyltransferase<br>activity              | MF          | 4.26E-24 | 1.62E-26        | 48              |
| GO:0020037 | heme binding                                                       | MF          | 8.85E-22 | 3.76E-24        | 125             |
| GO:0005506 | iron ion binding                                                   | MF          | 2.16E-21 | 9.28E-24        | 130             |
| GO:0009817 | defense response to fungus,<br>incompatible interaction            | BP          | 1.32E-20 | 6.01E-23        | 93              |
| GO:0052640 | salicylic acid glucosyltransferase<br>(glucoside-forming) activity | MF          | 3.60E-20 | 1.68E-22        | 37              |
| GO:0009805 | coumarin biosynthetic process                                      | BP          | 5.84E-20 | 2.82E-22        | 78              |
| GO:0050506 | vomilenine glucosyltransferase<br>activity                         | MF          | 5.84E-20 | 2.82E-22        | 29              |

|            |                                                    |    |          |          |    |
|------------|----------------------------------------------------|----|----------|----------|----|
| GO:0050247 | raucassicine beta-glucosidase activity             | MF | 5.84E-20 | 2.82E-22 | 29 |
| GO:0033329 | kaempferol <i>O</i> -glucoside metabolic process   | BP | 1.00E-19 | 5.11E-22 | 30 |
| GO:0033302 | quercetin <i>O</i> -glucoside metabolic process    | BP | 1.00E-19 | 5.11E-22 | 30 |
| GO:0033956 | beta-apiosyl-beta-glucosidase activity             | MF | 1.29E-18 | 6.73E-21 | 31 |
| GO:0102970 | 7-deoxyloganetic acid glucosyltransferase activity | MF | 1.50E-18 | 7.85E-21 | 26 |
| GO:0019762 | glucosinolate catabolic process                    | BP | 6.75E-18 | 3.90E-20 | 34 |
| GO:0010132 | dhurrin biosynthetic process                       | BP | 6.75E-18 | 3.83E-20 | 29 |
| GO:0033907 | beta-D-fucosidase activity                         | MF | 8.27E-18 | 4.93E-20 | 31 |
| GO:0047701 | beta-L-arabinosidase activity                      | MF | 8.27E-18 | 4.93E-20 | 31 |
| GO:0080083 | beta-gentiobiose beta-glucosidase activity         | MF | 8.27E-18 | 4.93E-20 | 31 |

**Supplementary Table 15.** Benchmarking Universal Single-Copy Orthologs (BUSCO) analysis about *caa\_assembly\_v\_10072011* and *C. acuminata* V3.0.

|                                | <b>Total<br/>BUSCO<br/>groups<br/>searched</b> | <b>Complete<br/>single-copy<br/>BUSCOs</b> | <b>Complete<br/>duplicated<br/>BUSCOs</b> | <b>Fragmented<br/>BUSCOs</b> | <b>Missing<br/>BUSCOs</b> | <b>Complete<br/>BUSCOs<br/>Percentage<br/>(%)</b> |
|--------------------------------|------------------------------------------------|--------------------------------------------|-------------------------------------------|------------------------------|---------------------------|---------------------------------------------------|
| <i>caa_assembly_v_10072011</i> | 1440                                           | 554                                        | 686                                       | 89                           | 111                       | 86.1                                              |
| <i>C. acuminata</i><br>V3.0    | 1440                                           | 1270                                       | 97                                        | 21                           | 52                        | 94.9                                              |

**Supplementary Table 16.** Accession numbers and sequence identities of *C. acuminata* candidate genes involved in the biosynthesis of Camptothecin.

| Description                                          | Abbreviation   | Query          | Top-hit <i>C. acuminata</i> gene ID | Identity (%) | Coverage (%) |
|------------------------------------------------------|----------------|----------------|-------------------------------------|--------------|--------------|
| Anthranilate synthase                                | ASA            | NP_196192.1    | CacGene15<br>948                    | 73.01        | 98.48        |
| Anthranilate phosphoribosyltransferase               | APT            | NP_001185362.1 | CacGene17<br>722                    | 69.63        | 100          |
| Phosphoribosylantranilate isomerase                  | PAI            | NP_001184931.1 | CacGene19<br>966                    | 68.57        | 73.09        |
| Indole-3-glycerol phosphate synthase                 | IGPS           | NP_178521.1    | CacGene19<br>211                    | 67.66        | 99.50        |
| Tryptophan synthase                                  | TS-alpha chain | NP_567004.1    | CacGene24<br>069                    | 69.84        | 96.79        |
|                                                      | TS-beta chain  | NP_194437.1    | CacGene25<br>673                    | 80.34        | 99.58        |
| Tryptophan decarboxylase                             | TDC            | AAA33109.1     | CacGene21<br>142 (TDC1)             | 69.15        | 96.20        |
|                                                      |                |                | CacGene13<br>733 (TDC2)             | 67.35        | 97.60        |
| 1-Deoxy-D-xylulose-5-phosphate synthase              | DXS            | ABI35993.1     | CacGene07<br>953                    | 77.60        | 96.14        |
| 1-Deoxy-D-xylulose-5-phosphate reductoisomerase      | DXR            | AAF65154.1     | CacGene14<br>522                    | 88.82        | 98.34        |
| 4-Diphosphocytidyl-2-C-methyl-D-erythritol synthase  | CMS            | ACI16377       | CacGene08<br>828                    | 77.82        | 86.75        |
| 4-Diphosphocytidyl-2-C-methyl-D-erythritol kinase    | CMK            | ABI35992.1     | CacGene00<br>537                    | 83.28        | 73.49        |
| 2C-Methyl-D-erythritol 2,4-cyclodiphosphate synthase | MCS            | AAF65155.1     | CacGene21<br>954                    | 73.77        | 97.92        |
| 1-Hydroxy-2-methyl-2-butenyl-4-diphosphate synthase  | HDS            | AAO24774.1     | CacGene11<br>201                    | 89.19        | 98.40        |

|                                                             |          |            |                  |       |       |
|-------------------------------------------------------------|----------|------------|------------------|-------|-------|
| 1-Hydroxy-2-methyl-<br>butenyl 4-diphosphate<br>reductase   | HDR      | ABI30631.1 | CacGene22<br>107 | 83.77 | 98.30 |
| Isopentenyl<br>diphosphate isomerase                        | IDI      | ABW98669.1 | CacGene09<br>399 | 80.67 | 84.85 |
| geranyl<br>pyrophosphate<br>synthase                        | GPS      | ACC77966.1 | CacGene21<br>163 | 77.14 | 98.59 |
| Geraniol synthase                                           | GS       | AFD64744   | CacGene15<br>279 | 65.16 | 92.14 |
| geraniol<br>8-hydroxylase                                   | G8H      | CAC80883.1 | CacGene19<br>461 | 60.40 | 98.00 |
| 8-hydroxygeraniol<br>oxidoreductase                         | 8HO      | AHK60836.1 | CacGene09<br>426 | 71.69 | 98.18 |
| CYC1(Iridoid<br>synthase)                                   | CYC1(IS) | AFW98981.1 | CacGene01<br>310 | 65.90 | 98.48 |
| 7-Deoxyloganetic acid<br>synthase                           | 7-DLS    | AHX24370.1 | CacGene21<br>929 | 78.44 | 95.61 |
| 7-Deoxyloganetic<br>acid- <i>O</i> -glucosyltransf<br>erase | 7-DLGT   | AHK60835.1 | CacGene15<br>981 | 77.80 | 94.89 |
| 7-Deoxyloganic acid<br>7-hydroxylase                        | 7-DLH    | AGX93062.1 | CacGene13<br>171 | 69.58 | 94.71 |
| loganic acid<br>methyltransferase                           | LAMT     | ABW38009.1 | CacGene05<br>741 | 53.91 | 93.37 |
| secologanin synthase                                        | SLS      | AAA33106.1 | CacGene10<br>833 | 63.36 | 98.31 |
| Strictosidine synthase                                      | STS      | P18417.2   | CacGene06<br>084 | 41.13 | 78.49 |

**Supplementary Table 17.** Gene copy number of enzymes involved in the biosynthesis of Camptothecin in 8 selected plant species by ortholog groups.

| EC number   | Enzyme name    | Vvi | Cca | Ath | Cac | Dca | Cro | Lsa | Rde | Ortholog group |
|-------------|----------------|-----|-----|-----|-----|-----|-----|-----|-----|----------------|
| 4.1.3.27    | ASA            | 2   | 2   | 3   | 3   | 3   | 2   | 2   | 4   | OCG1052        |
| 2.4.2.18    | APT            | 1   | 1   | 1   | 1   | 1   | 1   | 1   | 1   | OCG8977        |
| 5.3.1.24    | PAI            | 1   | 1   | 3   | 1   | 1   | 1   | 1   | 1   | OCG4374        |
| 4.1.1.48    | IGPS           | 1   | 1   | 2   | 1   | 1   | 2   | 2   | 1   | OCG4258        |
|             | TS-alpha chain | 1   | 1   | 2   | 1   | 1   | 1   | 1   | 1   | OCG7519        |
| 4.2.1.20    |                |     |     |     |     |     |     |     |     |                |
|             | TS-beta chain  | 2   | 2   | 3   | 2   | 1   | 2   | 2   | 5   | OCG1289        |
| 4.1.1.28    | TDC            | 3   | 7   | 2   | 6   | 8   | 3   | 5   | 1   | OCG439*        |
| 2.2.1.7     | DXS            | 12  | 6   | 10  | 14  | 13  | 8   | 10  | 6   | OCG113*        |
| 1.1.1.267   | DXR            | 1   | 2   | 1   | 2   | 1   | 1   | 2   | 1   | OCG3911*       |
| 2.7.7.60    | CMS            | 1   | 1   | 1   | 1   | 2   | 1   | 1   | 1   | OCG6631        |
| 2.7.1.148   | CMK            | 1   | 1   | 1   | 1   | 1   | 1   | 1   | 1   | OCG9196        |
| 4.6.1.12    | MCS            | 1   | 1   | 1   | 1   | 1   | 1   | 1   | 1   | OCG8917        |
| 1.17.7.1    | HDS            | 1   | 1   | 1   | 2   | 2   | 1   | 1   | 1   | OCG4846*       |
| 1.17.7.3    |                |     |     |     |     |     |     |     |     |                |
| 1.17.7.4    | HDR            | 1   | 1   | 1   | 1   | 3   | 1   | 2   | 3   | OCG2846        |
| 5.3.3.2     | IDI            | 1   | 1   | 2   | 1   | 1   | 1   | 1   | 1   | OCG5899        |
| 2.5.1.1     | GPS            | 1   | 1   | 1   | 1   | 1   | 1   | 1   | 2   | OCG7218        |
| 3.1.7.11    | GS             | 2   | 2   | 0   | 1   | 0   | 1   | 1   | 1   | OCG8068        |
| 1.14.13.152 | G8H            | 10  | 6   | 7   | 3   | 5   | 4   | 22  | 11  | OCG149         |
| 1.1.1.324   | 8HO            | 3   | 1   | 0   | 2   | 1   | 1   | 1   | 2   | OCG3957*       |
|             | CYC1(IS)       | 1   | 3   | 1   | 5   | 4   | 4   | 2   | 3   | OCG903*        |
|             | 7-DLS          | 6   | 3   | 1   | 5   | 17  | 4   | 2   | 5   | OCG311         |
|             | 7-DLGT         | 4   | 9   | 0   | 6   | 0   | 7   | 6   | 6   | OCG377*        |
|             | 7-DLH/SLS      | 20  | 35  | 8   | 18  | 4   | 16  | 21  | 8   | OCG55*         |
|             | LAMT           | 0   | 0   | 4   | 1   | 0   | 1   | 0   | 4   | OCG4731        |

\*Ortholog groups which are expanded in *C. acuminata*. Source data are provided as a Source data file.

**Supplementary Table 18.** Genes in gray60 modules with weight over 0.25 and their function annotation.

| Gene ID      | Degree<br>(Hub-level) | Function annotation by SWISS-PROT                                                                  |
|--------------|-----------------------|----------------------------------------------------------------------------------------------------|
| CacGene27626 | 83                    | SABP2_TOBAC Salicylic acid-binding 2 OS=Nicotiana tabacum<br>GN=SABP2 PE=1 SV=1                    |
| CacGene21929 | 81                    | C76A2_SOLME Cytochrome P450 76A2 OS=Solanum melongena<br>GN=CYP76A2 PE=2 SV=1                      |
| CacGene01309 | 80                    | 5BPOR_DIGLA 3-oxo-Delta(4,5)-steroid 5-beta-reductase OS=Digitalis<br>lanata PE=1 SV=1             |
| CacGene10416 | 80                    | BH025_ARATH Transcription factor bHLH25 OS=Arabidopsis thaliana<br>GN=BHLH25 PE=2 SV=2             |
| CacGene01310 | 79                    | IRIS_CATRO Iridoid synthase OS=Catharanthus roseus PE=1 SV=1                                       |
| CacGene02631 | 77                    | IN22_MAIZE IN2-2 OS=Zea mays GN=IN2-2 PE=2 SV=1                                                    |
| CacGene07617 | 77                    | LSH3_ARATH LIGHT-DEPENDENT SHORT HYPOCOTYLS 3<br>OS=Arabidopsis thaliana GN=LSH3 PE=1 SV=1         |
| CacGene15336 | 77                    | ---NA---                                                                                           |
| CacGene02632 | 76                    | AKR2_ORYSJ Probable aldo-keto reductase 2 OS=Oryza sativa<br>japonica GN=Os04g0338000 PE=2 SV=2    |
| CacGene05419 | 76                    | C76A2_SOLME Cytochrome P450 76A2 OS=Solanum melongena<br>GN=CYP76A2 PE=2 SV=1                      |
| CacGene15279 | 76                    | TPS11_RICCO Probable terpene synthase 11 OS=Ricinus communis<br>GN=TPS11 PE=3 SV=1                 |
| CacGene10059 | 74                    | PGLR4_ARATH Polygalacturonase At1g48100 OS=Arabidopsis<br>thaliana GN=At1g48100 PE=2 SV=1          |
| CacGene09376 | 73                    | MYBC_MAIZE Anthocyanin regulatory C1 OS=Zea mays GN=C1<br>PE=2 SV=1                                |
| CacGene07206 | 72                    | ---NA---                                                                                           |
| CacGene09135 | 72                    | TPS32_SOLLC Viridiflorene synthase OS=Solanum lycopersicum<br>GN=TPS32 PE=1 SV=1                   |
| CacGene18745 | 71                    | TRXH2_ARATH Thioredoxin H2 OS=Arabidopsis thaliana GN=TRX2<br>PE=2 SV=2                            |
| CacGene16081 | 68                    | LSH10_ARATH LIGHT-DEPENDENT SHORT HYPOCOTYLS 10<br>OS=Arabidopsis thaliana GN=LSH10 PE=1 SV=1      |
| CacGene16906 | 68                    | ZIP1_ARATH Zinc transporter 1 OS=Arabidopsis thaliana GN=ZIP1<br>PE=2 SV=1                         |
| CacGene00105 | 66                    | EXB15_ORYSJ Expansin-B15 OS=Oryza sativa japonica GN=EXPB15<br>PE=3 SV=2                           |
| CacGene00948 | 66                    | ATESY_VITVI (-)-alpha-terpineol synthase OS=Vitis vinifera PE=1<br>SV=1                            |
| CacGene12065 | 64                    | DREB3_ARATH Dehydration-responsive element-binding 3<br>OS=Arabidopsis thaliana GN=DREB3 PE=2 SV=1 |



|              |    |                                                                                                                          |
|--------------|----|--------------------------------------------------------------------------------------------------------------------------|
| CacGene22177 | 64 | ---NA---                                                                                                                 |
| CacGene13171 | 63 | C7A29_PANGI Cytochrome P450 CYP72A219 OS=Panax ginseng<br>PE=2 SV=1                                                      |
| CacGene14429 | 63 | BH096_ARATH Transcription factor bHLH96 OS=Arabidopsis thaliana<br>GN=BHLH96 PE=2 SV=1                                   |
| CacGene09428 | 62 | ADHL1_ARATH Alcohol dehydrogenase-like 1 OS=Arabidopsis<br>thaliana GN=At1g22430 PE=2 SV=1                               |
| CacGene02917 | 61 | HFA6B_ARATH Heat stress transcription factor A-6b OS=Arabidopsis<br>thaliana GN=HSFA6b PE=2 SV=1                         |
| CacGene04626 | 61 | LBD1_ARATH LOB domain-containing 1 OS=Arabidopsis thaliana<br>GN=LBD1 PE=2 SV=1                                          |
| CacGene26584 | 61 | LSH6_ARATH LIGHT-DEPENDENT SHORT HYPOCOTYLS 6<br>OS=Arabidopsis thaliana GN=LSH6 PE=1 SV=1                               |
| CacGene14783 | 60 | IQD14_ARATH IQ-DOMAIN 14 OS=Arabidopsis thaliana GN=IQD14<br>PE=1 SV=1                                                   |
| CacGene05598 | 59 | DXR_MENPI 1-deoxy-D-xylulose 5-phosphate chloroplastic<br>OS=Mentha piperita GN=DXR PE=2 SV=2                            |
| CacGene14542 | 59 | AKT1_ARATH Potassium channel AKT1 OS=Arabidopsis thaliana<br>GN=AKT1 PE=1 SV=2                                           |
| CacGene10972 | 58 | HIP35_ARATH Heavy metal-associated isoprenylated plant 35<br>OS=Arabidopsis thaliana GN=HIP35 PE=2 SV=1                  |
| CacGene23928 | 58 | LSH10_ARATH LIGHT-DEPENDENT SHORT HYPOCOTYLS 10<br>OS=Arabidopsis thaliana GN=LSH10 PE=1 SV=1                            |
| CacGene06196 | 57 | INV1_ARATH Beta- insoluble isoenzyme CWINV1 OS=Arabidopsis<br>thaliana GN=CWINV1 PE=1 SV=1                               |
| CacGene22551 | 56 | PIRL_SOLLC Pirin OS=Solanum lycopersicum PE=2 SV=1                                                                       |
| CacGene15981 | 54 | UGT8_CATRO 7-deoxyloganetic acid glucosyltransferase<br>OS=Catharanthus roseus GN=UGT709C2 PE=1 SV=1                     |
| CacGene25245 | 54 | CYCLD_ANTMA Transcription factor CYCLOIDEA OS=Antirrhinum<br>majus GN=CYC PE=1 SV=1                                      |
| CacGene02914 | 53 | EPFL4_ARATH EPIDERMAL PATTERNING FACTOR 4<br>OS=Arabidopsis thaliana GN=EPFL4 PE=1 SV=1                                  |
| CacGene02721 | 52 | TRM7_DICDI tRNA (cytidine(32) guanosine(34))-2<br>-O)-methyltransferase OS=Dictyostelium discoideum GN=fsjA PE=3<br>SV=1 |
| CacGene02620 | 51 | BOR2_ARATH Probable boron transporter 2 OS=Arabidopsis thaliana<br>GN=BOR2 PE=2 SV=1                                     |
| CacGene13909 | 51 | HIP26_ARATH Heavy metal-associated isoprenylated plant 26<br>OS=Arabidopsis thaliana GN=HIP26 PE=1 SV=1                  |
| CacGene18693 | 51 | RSS3_ORYSJ RICE SALT SENSITIVE 3 OS=Oryza sativa japonica<br>GN=RSS3 PE=1 SV=1                                           |
| CacGene19215 | 51 | AB1K7_ARATH ACTIVITY OF BC1 COMPLEX KINASE                                                                               |

|              |    |                                                                                                             |
|--------------|----|-------------------------------------------------------------------------------------------------------------|
|              |    | chloroplastic OS=Arabidopsis thaliana GN=ABC1K7 PE=2 SV=1                                                   |
| CacGene20894 | 49 | ZWIP3_ARATH Zinc finger WIP3 OS=Arabidopsis thaliana GN=WIP3 PE=2 SV=1                                      |
| CacGene23366 | 49 | AHP4_ARATH Histidine-containing phosphotransfer 4 OS=Arabidopsis thaliana GN=AHP4 PE=1 SV=2                 |
| CacGene01655 | 48 | BGL47_ARATH Beta-glucosidase 47 OS=Arabidopsis thaliana GN=BGLU47 PE=3 SV=2                                 |
| CacGene21020 | 48 | BRG1_ARATH BOI-related E3 ubiquitin- ligase 1 OS=Arabidopsis thaliana GN=BRG1 PE=1 SV=1                     |
| CacGene18277 | 47 | RAY1_ARATH Beta-arabinofuranosyltransferase RAY1 OS=Arabidopsis thaliana GN=RAY1 PE=2 SV=1                  |
| CacGene19123 | 44 | AZG2_ARATH Adenine guanine permease AZG2 OS=Arabidopsis thaliana GN=AZG2 PE=2 SV=1                          |
| CacGene17278 | 43 | F3PH_ARATH Flavonoid 3 -monooxygenase OS=Arabidopsis thaliana GN=CYP75B1 PE=1 SV=1                          |
| CacGene23476 | 42 | SBT56_ARATH Subtilisin-like protease OS=Arabidopsis thaliana GN=PE=2 SV=1                                   |
| CacGene10013 | 41 | FTRC1_SPIOL Ferredoxin-thioredoxin reductase catalytic chloroplastic OS=Spinacia oleracea GN=FTRC PE=1 SV=2 |
| CacGene06978 | 39 | NUD20_ARATH Nudix hydrolase chloroplastic OS=Arabidopsis thaliana GN=NUDT20 PE=2 SV=1                       |
| CacGene20462 | 39 | ZWIP2_ARATH Zinc finger WIP2 OS=Arabidopsis thaliana GN=WIP2 PE=1 SV=1                                      |
| CacGene10425 | 38 | BH093_ARATH Transcription factor bHLH93 OS=Arabidopsis thaliana GN=BHLH93 PE=1 SV=1                         |
| CacGene26945 | 32 | YUC6_ARATH Indole-3-pyruvate monooxygenase YUCCA6 OS=Arabidopsis thaliana GN=YUC6 PE=1 SV=1                 |
| CacGene07629 | 31 | PHT17_ARATH Probable inorganic phosphate transporter 1-7 OS=Arabidopsis thaliana GN=PHT1-7 PE=2 SV=2        |
| CacGene12748 | 31 | SUT13_ARATH Sulfate transporter OS=Arabidopsis thaliana GN=SULTR1 3 PE=2 SV=1                               |
| CacGene03019 | 29 | METK5_VITVI S-adenosylmethionine synthase 5 OS=Vitis vinifera GN=METK5 PE=3 SV=1                            |
| CacGene15528 | 29 | CHX20_ARATH Cation H(+) antiporter 20 OS=Arabidopsis thaliana GN=CHX20 PE=2 SV=1                            |
| CacGene04171 | 28 | CCD11_ARATH Cyclin-D1-1 OS=Arabidopsis thaliana GN=CYCD1-1 PE=1 SV=3                                        |
| CacGene09430 | 27 | ADHL3_ARATH Alcohol dehydrogenase-like 3 OS=Arabidopsis thaliana GN=At1g32780 PE=2 SV=1                     |
| CacGene03548 | 25 | ---NA---                                                                                                    |
| CacGene04103 | 25 | PLRX3_ARATH Pollen-specific leucine-rich repeat extensin 3 OS=Arabidopsis thaliana GN=PEX3 PE=2 SV=1        |

|              |    |                                                                                                                        |
|--------------|----|------------------------------------------------------------------------------------------------------------------------|
| CacGene08463 | 24 | IQM2_ARATH IQ domain-containing IQM2 OS=Arabidopsis thaliana GN=IQM2 PE=2 SV=1                                         |
| CacGene15721 | 23 | DEF02_ARATH Defensin 2 OS=Arabidopsis thaliana GN= PE=2 SV=1                                                           |
| CacGene25108 | 22 | GDL6_ARATH GDSL esterase lipase At1g28570 OS=Arabidopsis thaliana GN=At1g28570 PE=3 SV=1                               |
| CacGene24459 | 20 | CYB5_TOBAC Cytochrome b5 OS=Nicotiana tabacum PE=2 SV=1                                                                |
| CacGene26195 | 20 | LAC14_ARATH Laccase-14 OS=Arabidopsis thaliana GN=LAC14 PE=2 SV=1                                                      |
| CacGene16153 | 19 | GIS3_ARATH Zinc finger GIS3 OS=Arabidopsis thaliana GN=GIS3 PE=2 SV=1                                                  |
| CacGene22926 | 19 | Y5258_ARATH Stress-response A B barrel domain-containing At5g22580 OS=Arabidopsis thaliana GN=At5g22580 PE=1 SV=1      |
| CacGene19847 | 18 | ---NA---                                                                                                               |
| CacGene06691 | 17 | EXPB2_ARATH expansin-B2 OS=Arabidopsis thaliana GN=EXPB2 PE=3 SV=2                                                     |
| CacGene22059 | 16 | GLGL1_SOLTU Glucose-1-phosphate adenylyltransferase large subunit 1 (Fragment) OS=Solanum tuberosum GN=AGPS1 PE=2 SV=1 |
| CacGene17921 | 13 | KCO1_ARATH Two-pore potassium channel 1 OS=Arabidopsis thaliana GN=TPK1 PE=1 SV=2                                      |
| CacGene26870 | 12 | ---NA---                                                                                                               |
| CacGene05420 | 10 | C76A2_SOLME Cytochrome P450 76A2 OS=Solanum melongena GN=CYP76A2 PE=2 SV=1                                             |
| CacGene23478 | 10 | SBT55_ARATH Subtilisin-like protease OS=Arabidopsis thaliana GN= PE=3 SV=2                                             |
| CacGene08793 | 9  | APA1_ARATH Aspartic ase A1 OS=Arabidopsis thaliana GN=APA1 PE=1 SV=1                                                   |
| CacGene05289 | 8  | RAP27_ARATH Ethylene-responsive transcription factor RAP2-7 OS=Arabidopsis thaliana GN=RAP2-7 PE=2 SV=2                |
| CacGene06910 | 8  | RDR3_ARATH Probable RNA-dependent RNA polymerase 3 OS=Arabidopsis thaliana GN=RDR3 PE=3 SV=2                           |
| CacGene20120 | 6  | DIR23_ARATH Dirigent 23 OS=Arabidopsis thaliana GN=DIR23 PE=2 SV=1                                                     |
| CacGene08470 | 5  | ---NA---                                                                                                               |
| CacGene05421 | 4  | C76A2_SOLME Cytochrome P450 76A2 OS=Solanum melongena GN=CYP76A2 PE=2 SV=1                                             |
| CacGene08325 | 4  | SRS5_ARATH SHI RELATED SEQUENCE 5 OS=Arabidopsis thaliana GN=SRS5 PE=2 SV=1                                            |
| CacGene04487 | 2  | ---NA---                                                                                                               |

**Supplementary Table 19.** Summary of RNA sequencing data.

| <b>SRA run number</b> | <b>Tissue</b>   | <b>Read type</b>    | <b>Number of reads</b> | <b>Total data (Gb)</b> | <b>Read length (bp)</b> | <b>Mapping rate (%)</b> | <b>Use</b>                                           |
|-----------------------|-----------------|---------------------|------------------------|------------------------|-------------------------|-------------------------|------------------------------------------------------|
| SRR173032             | Whole seedlings | Illumina paired-end | 20,222,772             | 2.22                   | 2 x 55                  | 72.52                   | expression level calculation                         |
| SRR173033             | Young leaf      | Illumina paired-end | 44,155,958             | 6.62                   | 2 x 75                  | 67.25                   | expression level calculation                         |
| SRR173034             | Mature leaf     | Illumina paired-end | 45,437,386             | 6.82                   | 2 x 75                  | 92.09                   | transcriptome assembly, expression level calculation |
| SRR173035             | Immature bark   | Illumina paired-end | 42,272,958             | 6.34                   | 2 x 75                  | 93.49                   | transcriptome assembly, expression level calculation |
| SRR173036             | Entire root     | Illumina paired-end | 44,473,260             | 6.67                   | 2 x 75                  | 91.50                   | transcriptome assembly, expression level calculation |
| SRR173042             | Callus          | Illumina single-end | 25,812,941             | 0.90                   | 35                      | 93.30                   | expression level calculation                         |
| SRR173043             | Root culture    | Illumina single-end | 24,961,098             | 0.87                   | 35                      | 92.70                   | expression level calculation                         |
| SRR173044             | Young flower    | Illumina paired-end | 36,383,996             | 5.46                   | 2 x 75                  | 90.00                   | transcriptome assembly, expression level calculation |
| SRR173045             | Immature fruit  | Illumina paired-end | 42,604,968             | 6.39                   | 2 x 75                  | 87.66                   | transcriptome assembly, expression level calculation |
| SRR173046             | Mature fruit    | Illumina paired-end | 25,101,356             | 3.77                   | 2 x 75                  | 85.90                   | transcriptome assembly, expression level calculation |
| SRR173047             | Trichomes       | Illumina paired-end | 40,748,840             | 6.11                   | 2 x 75                  | 72.02                   | expression level calculation                         |
| SRR173048             | Advance roots   | Illumina paired-end | 44,469,609             | 6.67                   | 2 x 75                  | 90.63                   | expression level calculation                         |
| SRR173052             | Cotyledons      | Illumina paired-end | 37,086,312             | 5.56                   | 2 x 75                  | 92.35                   | transcriptome assembly, expression level calculation |

|           |               |                        |            |      |        |       |                                                            |
|-----------|---------------|------------------------|------------|------|--------|-------|------------------------------------------------------------|
| SRR173053 | Upper stem    | Illumina<br>paired-end | 38,056,744 | 5.71 | 2 x 75 | 94.01 | transcriptome assembly,<br>expression level<br>calculation |
| SRR173054 | Lower<br>stem | Illumina<br>paired-end | 36,342,362 | 5.45 | 2 x 75 | 96.09 | transcriptome assembly,<br>expression level<br>calculation |

**Supplementary Table 20.** Primers used for amplification of CrLAMT and CaLAMT.

| <b>Primer name</b>    | <b>Sequence ( 5' to 3')</b> |
|-----------------------|-----------------------------|
| CrLAMT-KF415116_F     | ATGGTTGCCACAATTGA           |
| CrLAMT-KF415116_R     | TTAATTTCCCTTGCGTTTCAAG      |
| CaLAMT-CacGene05741_F | ATGGCTAATGAGGAGCCCA         |
| CaLAMT-CacGene05741_R | TTAATCAGTCATTTTACGTTTAAG    |



pESC-CrLAMT-KF415116-H245F\_F

TTGGGAACCTTCCTTGATGGA

pESC-CrLAMT-KF415116-H245F\_R

TCCATCAAGGAAGTTCCCAAAGGAAAAAA  
AGCAAACCAGCACCAG

---
