# Supplementary material for: A chromosome-level Camptotheca acuminata genome assembly provides insights into the evolutionary origin of camptothecin biosynthesis
Source: PubMed Central journal article supplement (PMC8192753; doi:10.1038/s41467-021-23872-9), 2021-06-10
Supplement: 41467_2021_23872_MOESM4_ESM.pdf [file 41467_2021_23872_MOESM4_ESM.pdf]

## **Description of additional supplementary files**

Title: Supplementary Data 1

Description: Protein-coding genes may have wrong structure annotation in *Cac* genome assembly v2.4 compare with *C. acuminata* V3.0.

Title: Supplementary Data 2

Description: Expression abundance matrix (fragments per kb exon model per million mapped reads) from 15 tissues of *C. acuminata*.

Title: Supplementary Data 3

Description: Differential expressed genes and their expression abundance matrix (fragments per kb exon model per million mapped reads) from 15 tissues of *C. acuminata*.

Title: Supplementary Data 4

Description: Genes classified into 30 modules in different colors by WGCNA.

Title: Supplementary Data 5

Description: Selection analysis of LAMT using the branch site model (BSM). Significance was tested by two tailed likelihood ratio test (LRT) method.

Title: Supplementary Data 6

Description: Selection analysis of LAMT using the branch model (BM). Significance was tested by two tailed likelihood ratio test (LRT) method.

Title: Supplementary Data 7

Description: Summary of relative activity of the LAMTs.

Title: Supplementary Data 8

Description: Selection analysis of SLS/SLAS using the branch site model (BSM). Significance was tested by two tailed likelihood ratio test (LRT) method.
